# 1 Creating Artificial Human Genomes Using Generative 2 Models

3  
4 **Authors:** Burak Yelmen<sup>1,2,\*</sup>, Aurélien Decelle<sup>3</sup>, Linda Ongaro<sup>1,2</sup>, Davide Marnetto<sup>1</sup>, Corentin  
5 Tallec<sup>3</sup>, Francesco Montinaro<sup>1,4</sup>, Cyril Furtlehner<sup>3</sup>, Luca Pagani<sup>1,5</sup>, Flora Jay<sup>3,\*</sup>

## 6 **Affiliations:**

7  
8 *1 Institute of Genomics, University of Tartu, Estonia*

9 *2 Institute of Molecular and Cell Biology, University of Tartu, Estonia*

10 *3 Laboratoire de Recherche en Informatique, CNRS UMR 8623, Université Paris-Sud,*

11 *Université Paris-Saclay, Orsay, France*

12 *4 Department of Zoology, University of Oxford, UK*

13 *5 APE Lab, Department of Biology, University of Padova, Italy*

14 *\*to whom correspondence should be addressed: [burakyelmen@gmail.com](mailto:burakyelmen@gmail.com), [flora.jay@lri.fr](mailto:flora.jay@lri.fr)*

## 15 **Abstract**

16 Generative models have shown breakthroughs in a wide spectrum of domains due to  
17 recent advancements in machine learning algorithms and increased computational  
18 power. Despite these impressive achievements, the ability of generative models to  
19 create realistic synthetic data is still under-exploited in genetics and absent from  
20 population genetics.

21

22 Yet a known limitation of this field is the reduced access to many genetic databases  
23 due to concerns about violations of individual privacy, although they would provide a  
24 rich resource for data mining and integration towards advancing genetic studies. Here  
25 we demonstrate that we can train deep generative adversarial networks (GANs) and  
26 restricted Boltzmann machines (RBMs) to learn the high dimensional distributions of  
27 real genomic datasets and create artificial genomes (AGs). Additionally, we ensure  
28 none to little privacy loss while generating high quality AGs. To illustrate the promising  
29 outcomes of our method, we show that augmenting reference panels with AGs  
30 improves imputation quality for low frequency alleles. In summary, AGs have the  
31 potential to become valuable assets in genetic studies by providing high quality  
32 anonymous substitutes for private databases.

## 33 **Introduction**

34 Availability of genetic data has increased tremendously due to advances in sequencing  
35 technologies and reduced costs (Mardis 2017). The vast amount of human genetic  
36 data is used in a wide range of fields, from medicine to evolution. Despite the  
37 advances, cost is still a limiting factor and more data is always welcomed, especially  
38 in population genetics and genome-wide association studies (GWAS) which usually  
39 require substantial amounts of samples. Partially related to the costs but also to the  
40 research bias toward studying populations of European ancestry, many autochthonous  
41 populations are under-represented in genetic databases, diminishing the extent of the  
42 resolution in many studies (Cann 2002; Popejoy and Fullerton 2016; Mallick et al.  
43 2016; Sirugo et al. 2019). Additionally, a huge portion of the data held by government  
44 institutions and private companies is considered sensitive and not easily accessible  
45 due to privacy issues, exhibiting yet another barrier for scientific work. A class of  
46 machine learning methods called generative models might provide a suitable solution  
47 to these problems.

48  
49 Generative models are used in unsupervised machine learning to discover intrinsic  
50 properties of data and produce new data points based on those. In the last decade,  
51 generative models have been studied and applied in many domains of machine  
52 learning (Libbrecht and Noble 2015; Zhang et al. 2017; Rolnick and Dyer 2019). There  
53 have also been a few applications in the genetics field (Davidsen et al. 2019; Liu et al.  
54 2019). Among the various generative approaches, we focus on two of them in this  
55 study, generative adversarial networks (GANs) and restricted Boltzmann machines  
56 (RBMs). GANs are generative neural networks which are capable of learning complex  
57 data distributions in a variety of domains (Goodfellow et al. 2014). A GAN consists of  
58 two neural networks, a generator and a discriminator, which compete in a zero-sum  
59 game (Supplementary Figure 1). During training, the generator produces new  
60 instances while the discriminator evaluates their authenticity. The training objective  
61 consists in learning the data distribution in a way such that the new instances created  
62 by the generator cannot be distinguished from true data by the discriminator. Since  
63 their first introduction, there have been many successful applications of GANs, ranging  
64 from generating high quality, realistic imagery to gap filling in texts (Ledig et al. 2017;

65 Fedus et al. 2018). GANs are currently the state-of-the-art models for generating  
66 realistic images (Brock et al. 2018).

67  
68 A restricted Boltzmann machine, initially called Harmonium is another generative  
69 model which is a type of neural network capable of learning probability distributions  
70 through input data (Smolensky 1986; Teh and Hinton 2001). RBMs are two layer neural  
71 networks consisting of an input (visible) layer and a hidden layer (Supplementary  
72 Figure 2). The learning procedure for the RBM consists in maximizing the likelihood  
73 function over the visible variables of the model. This procedure is done by adjusting  
74 the weights such that the correlations between the visible and hidden variables on both  
75 the dataset and sampled configurations from the RBM converge. Then RBM models  
76 recreate data in an unsupervised manner through many forward and backward passes  
77 between these two layers (Gibbs sampling), corresponding to sampling from the  
78 learned distribution. The output of the hidden layer goes through an activation function,  
79 which in return becomes the input for the hidden layer. Although mostly overshadowed  
80 by recently introduced approaches such as GANs or Variational Autoencoders  
81 (Kingma and Welling 2013), RBMs have been used effectively for different tasks (such  
82 as collaborative filtering for recommender systems, image or document classification)  
83 and are the main components of deep belief networks (Hinton and Salakhutdinov 2006;  
84 Hinton 2007; Larochelle and Bengio 2008).

85  
86 Here we propose and compare a prototype GAN model along with an RBM model to  
87 create Artificial Genomes (AGs) which can mimic real genomes and capture population  
88 structure along with other characteristics of real genomes. We envision two main  
89 applications of our generative methods: (i) improving the performance of genomic  
90 tasks such as imputation, ancestry reconstruction, GWAS studies, by augmenting  
91 genomic panels with AGs serving as proxies for private datasets, (ii) demonstrating  
92 that a proper encoding of the genomic data can be learned and possibly used as a  
93 starting input of various inference tasks by combining this encoding with recent neural  
94 network-based tools for the reconstruction of recombination, demography or selection  
95 (Sheehan and Song 2016; Adrion et al. 2019; Flagel et al. 2019).

## 96 **Results**

### 97 **Reconstructing genome wide population structure:**

98 Initially we created AGs with GAN, RBM, and two simple generative models for  
99 comparison: a Bernoulli and a Markov chain model (see Materials & Methods) using  
100 2504 individuals (5008 haplotypes) from 1000 Genomes data (1000 Genomes Project  
101 Consortium et al. 2015), spanning 805 SNPs from all chromosomes which reflect a  
102 high proportion of the population structure present in the whole dataset (Colonna et al.  
103 2014). Both GAN and RBM models seem to capture a good portion of the population  
104 structure present in 1000 Genomes data while the other two models could only  
105 produce instances centered around 0 on principal component analysis (PCA) space  
106 (Figure 1). All major modes, corresponding to African, European and Asian genomes,  
107 seem to be well represented in AGs produced by GAN and RBM models. Uniform  
108 manifold approximation and projection (UMAP) mapping results also correlate with the  
109 performed PCA (Supplementary Figure 3). We additionally checked the distribution of  
110 pairwise differences of haploid genomes to see how different AGs are from real  
111 genomes (Supplementary Figure 4). Both RBM and GAN models seem to have highly  
112 similar distributions to the distribution of pairwise differences of the real genomes within  
113 themselves. Especially RBM excels at acquiring the real peaks, indicating a high  
114 similarity with real genomes. Since GANs and RBMs show an excellent performance  
115 for this use case, we further explored other characteristics using only these two  
116 models.

117 **Figure 1.** The six first axes of a PCA applied to real (gray) and artificial genomes (AGs)  
118 generated via Bernoulli (green), Markov chain (purple), GAN (blue) and RBM (red)  
119 models. There are 5000 haplotypes for each AG dataset and 5008 (2504 genomes)  
120 for the real dataset from 1000 Genomes spanning 805 informative SNPs. See  
121 Materials & Methods for detailed explanation of the generation procedures.

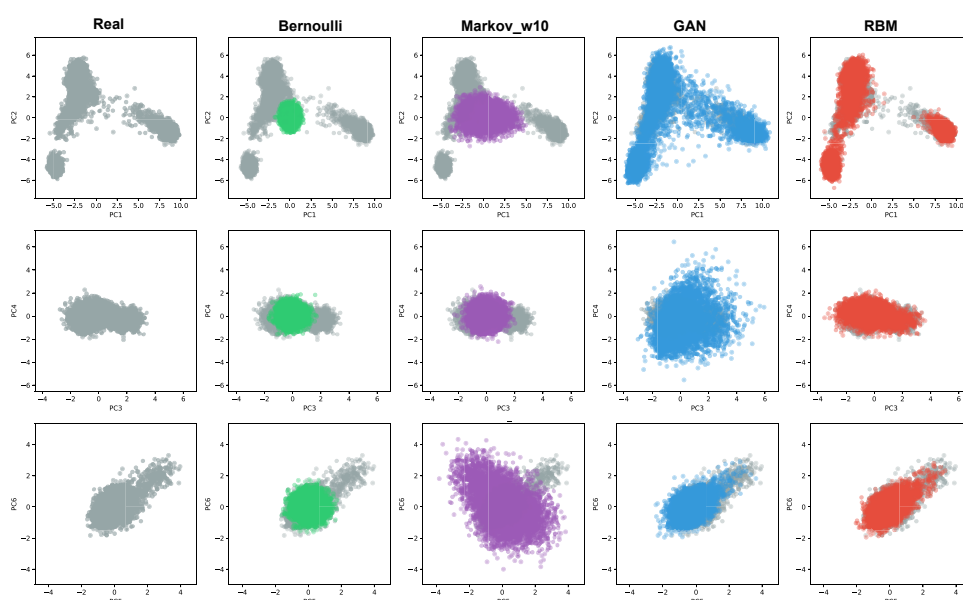

122  
123  
124 Furthermore, similarly to tSNE and UMAP, RBMs perform a non-linear dimension  
125 reduction of the data and provides a suitable representation of a genomic dataset as  
126 a by-product based on the non-linear feature space associated to the hidden layer  
127 (Supplementary Text). As Diaz-Papkovich et al (Diaz-Papkovich et al. 2019), we found  
128 that the RBM representation differs from the linear PCA ones. Here we plot the  
129 representation corresponding to the selected RBM model and exhibit its rapid evolution  
130 through training (Supplementary Figure 5).

131  
132 Supplementary Figure 5 shows that African, East Asian, and to a lesser extent,  
133 European populations stand out on the two first components. The Finnish are slightly  
134 isolated from the other European (similar to Peruvian from American) populations on  
135 the first components. South Asians are located at the center separated from  
136 Europeans, partially overlapping with American populations, and stand out at  
137 dimension 5 and higher. Interestingly when screening the hidden node activations, we  
138 observed that different populations or groups activate different hidden nodes, each one

139 representing a specific combination of SNPs, thereby confirming that the hidden layer  
140 provides a meaningful encoding of the data (Supplementary Figure 6).

141

### 142 **Reconstructing local high-density haplotype structure:**

143 To evaluate if high quality artificial dense genome sequences can also be created by  
144 the generative models, we applied the GAN and RBM methods to a 10K SNP region  
145 using (i) the same individuals from 1000 Genomes data and (ii) 1000 Estonian  
146 individuals from the high coverage Estonian Biobank (Leitsalu et al. 2015) to generate  
147 artificial genomes. PCA results of AGs spanning consecutive 10K SNPs show that both  
148 GAN and RBM models can still capture the relatively toned-down population structure  
149 (Supplementary Figure 7) as well as the overall distribution of pairwise distances  
150 (Supplementary Figure 8). Looking at the allele frequency comparison between real  
151 and artificial genomes, we see that especially GAN performs poorly for low frequency  
152 alleles, due to a lack of representation of these alleles in the AGs (Supplementary  
153 Figure 9). On the other hand, the distribution of the distance of real genomes to the  
154 closest AG neighbour show that GAN model, although slightly underfitting, outperforms  
155 RBM model, for which an excess of small distances points towards slight overfitting  
156 (Supplementary Figure 10).

157

158 Additionally, we performed linkage disequilibrium (LD) analyses comparing artificial  
159 and real genomes to assess how successfully the AGs imitate short and long range  
160 correlations between SNPs. Pairwise LD matrices for real and artificial genomes all  
161 show a similar block pattern demonstrating that GAN and RBM accurately captured  
162 the overall structure with SNPs having higher linkage in specific regions (Figure 2a).  
163 However plotting LD as a function of the SNP distance showed that all models capture  
164 weaker correlation, with RBM outperforming the GAN model perhaps due to its  
165 overfitting characteristic (Figure 2b). To further determine the haplotypic integrity of  
166 AGs, we performed ChromoPainter (Lawson et al. 2012) and Haplostrips (Marnetto  
167 and Huerta-Sánchez 2017) analyses on AGs created using Estonians as the training  
168 data. It was visually impossible to distinguish the difference between real and artificial  
169 genomes in terms of local haplotypic structure with Haplostrips (Supplementary Figure  
170 11). However, majority of the AGs produced via GAN model displayed fractured  
171 chunks when painted against 1000 Genomes individuals whereas RBM AGs were  
172 nearly indistinguishable from real genomes (Supplementary Figure 12).

173 **Figure 2.** Linkage disequilibrium (LD) analyses on real and artificial Estonian  
174 genomes. a) Correlation ( $r^2$ ) matrices of SNPs. Lower triangular parts are SNP  
175 pairwise correlation in real genomes and upper triangular parts are SNP pairwise  
176 correlation in artificial genomes. b) LD as a function of SNP distance. Pairwise SNP  
177 distances were stratified into 50 bins and for each distance bin the correlation was  
178 averaged over all pairs of SNPs belonging to the bin.  
179

a.

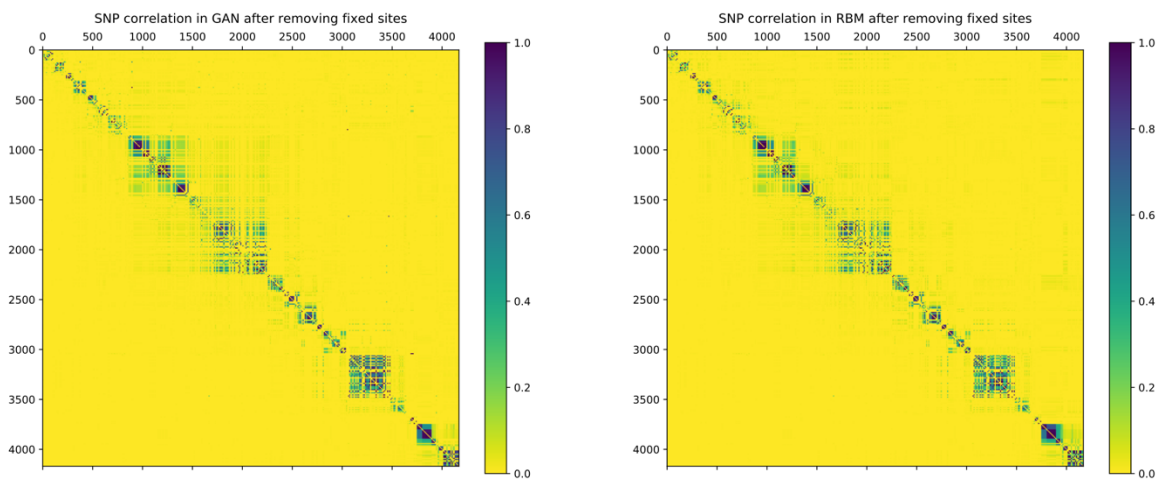

b.

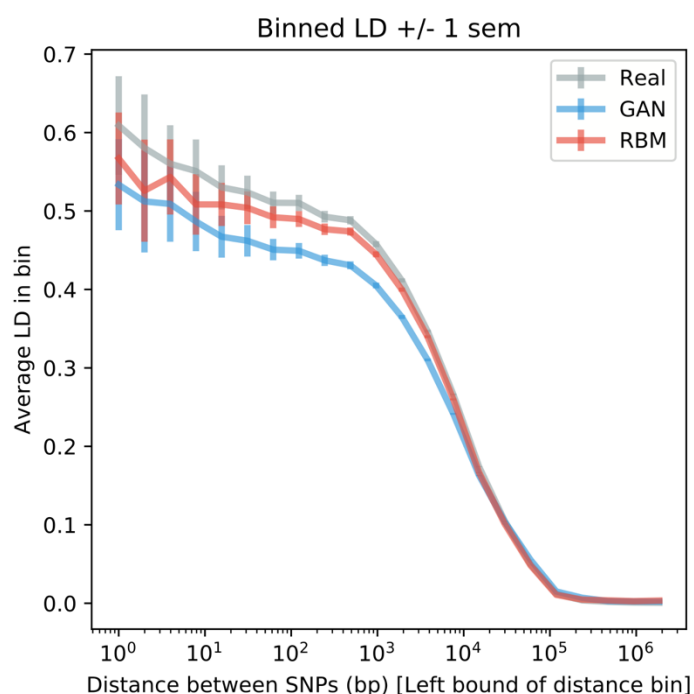



182 After demonstrating that our models generated realistic AGs according to the  
183 described summary statistics, we investigated further whether they respected privacy  
184 by measuring the extent of overfitting. We calculated two metrics of resemblance and  
185 privacy, the nearest neighbour adversarial accuracy (AA<sub>TS</sub>) and privacy loss presented  
186 in a recent study (Yale et al. 2019). AA<sub>TS</sub> score measures whether two datasets were  
187 generated by the same distribution based on the distances between all data points and  
188 their nearest neighbours in each set. When applied to artificial and real datasets, a  
189 score between 0.5 and 1 indicates underfitting, between 0 and 0.5 overfitting (and likely  
190 privacy loss), and exactly 0.5 indicates that the datasets are indistinguishable. By using  
191 an additional real test set, it is also possible to calculate a privacy loss score that is  
192 positive in case of information leakage, negative otherwise, and approximately ranges  
193 from -0.5 to 0.5. Computed on our generated data, both scores support haplotypic  
194 pairwise difference results confirming the underfitting nature of GAN AGs and slight  
195 overfitting nature of RBM AGs with a risk of privacy leakage for the latter (Figure 3a  
196 and 3b).

197

198 Since it has been shown in previous studies that imputation scores can be improved  
199 using additional population specific reference panels (Gurdasani et al. 2015; Mitt et al.  
200 2017), as a possible future use case, we tried imputing real Estonian genomes using  
201 1000 Genomes reference panel and additional artificial reference panels with Impute2  
202 software (Howie et al. 2011). Both combined RBM AG and combined GAN AG panels  
203 outperformed 1000 Genomes panel for the lowest MAF bin (for MAF < 0.05, 0.015 and  
204 0.024 improvement respectively) which had 5926 SNPs out of 9230 total (Figure 3b).  
205 Also mean info metric over all SNPs was 0.009 and 0.015 higher for combined RBM  
206 and GAN panels respectively, compared to the panel with only 1000 Genomes  
207 samples. However, aside from the lowest MAF bin, 1000 Genomes panel  
208 outperformed both concatenated panels for all the higher bins. This might be a  
209 manifestation of haplotypic deformities in AGs, that might have disrupted the  
210 imputation algorithm.

211

212

213 **Figure 3. a)** Nearest neighbour adversarial accuracy ( $AA_{TS}$ ) of artificial genomes  
 214 generated from Estonian Biobank. Black line indicates the optimum value whereas  
 215 values below the line indicate overfitting and values above the line indicate underfitting.  
 216 **b)** Privacy loss. Positive values indicate information leakage, hence overfitting. **c)**  
 217 Imputation evaluation of three different reference panels based on Impute2 software's  
 218 info metric. Imputation was performed on 8678 Estonian individuals (which were not  
 219 used in training of GAN and RBM models) using only 1000 Genomes panel (gray),  
 220 combined 1000 Genomes and GAN artificial genomes panel (blue) and combined 1000  
 221 Genomes and RBM artificial genomes panel (red). SNPs were divided into 10 strata,  
 222 from 0.05 to 0.1, after which mean info metric values were calculated for each stratum.  
 223 Bars in the zoomed section show the standard error of mean.  
 224

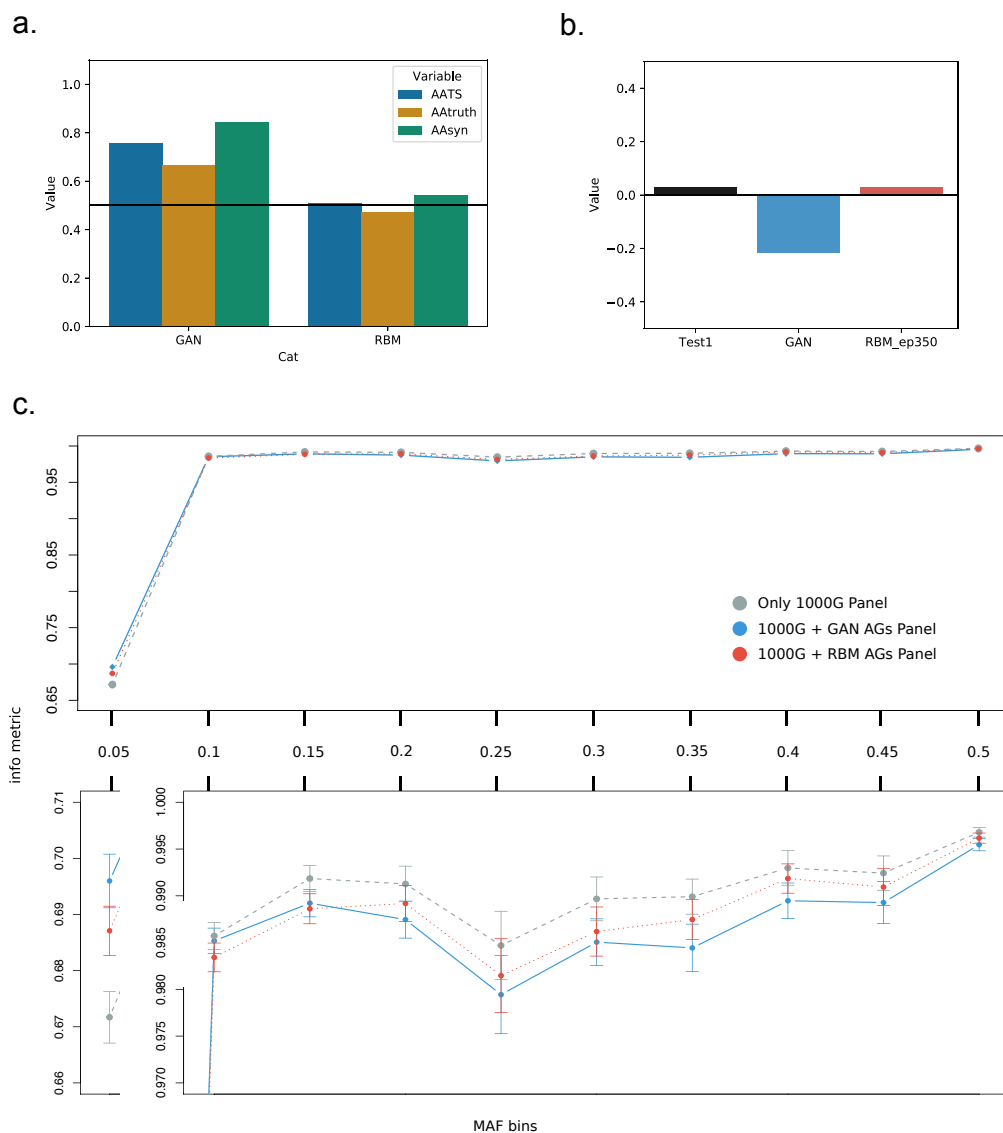

226 **Linking genotypes with phenotypes:**

227 We then explored the possibility of creating AGs with unphased genotype data and  
228 recreating phenotype-genotype associations using generative models. As a proof of  
229 concept, we created GAN AGs via training on 1925 Estonian individuals with 5000  
230 SNPs using unphased genotypes instead of haplotypes. There was an additional  
231 column in this dataset representing eye color (blue or brown). This region  
232 encompasses rs12913832 SNP which is highly associated with eye color (Han et al.  
233 2008; Eriksson et al. 2010; Zhang et al. 2013). In our real genomes dataset, nearly  
234 96% of the individuals possessing at least one ancestral allele A have brown eye color.  
235 The AGs were able to reproduce the same genotypic-phenotypic association with a  
236 ratio of 80% with the same allele A. Similarly, 97% of all blue-eyed individuals have the  
237 both derived alleles (G) whereas the same percentage is 88% in GAN AGs. There are  
238 no blue-eyed individuals who have both ancestral alleles in the real dataset but this  
239 number is 9 out 1925 in GAN AGs (Supplementary Table 1). We weren't able to create  
240 RBM AGs for this dataset.

## 241 **Discussion**

242 In this study, we applied generative models to produce artificial genomes and  
243 evaluated their characteristics. To the best of our knowledge, this is the first application  
244 of GAN and RBM models in this context, displaying overall promising applicability. We  
245 showed that population structure and frequency-based features of real populations can  
246 successfully be preserved in AGs created using GAN and RBM models. Furthermore,  
247 both models can be applied to sparse or dense SNP data given a large enough number  
248 of training individuals. Our different trials showed that the minimum required number  
249 of individuals for training is highly variable, possibly correlated with the diversity among  
250 individuals (data not shown). Since haplotype data is more informative, we created  
251 haplotypes for the analyses but we also demonstrated that the models can be applied  
252 to genotype data too, by simply combining two haplotypes if the training data is not  
253 phased (see Materials & Methods). In addition, we showed that it is possible to  
254 generate AGs with simple phenotypic traits through genotype data (see Results). Even  
255 though there were only two simple classes, blue and brown eye color phenotypes,  
256 generative models can be improved in the future to hold the capability to produce  
257 artificial datasets combining AGs with multiple phenotypes.

258  
259 One major drawback of the proposed models is that, due to computational limitations,  
260 they cannot yet be used to create whole artificial genomes but rather snippets or  
261 sequential dense chunks. Although parallel computing might be a solution, this might  
262 further disrupt the haplotype structure in AGs. Instead, adapting convolutional GANs  
263 for AG generation might be another possible solution in the future (Radford et al. 2016).  
264 Another problem arose due to rare alleles, especially for the GAN model. We showed  
265 that nearly half of the alleles become fixed in the GAN AGs in the 10K SNP dataset,  
266 whereas RBM AGs seem to capture more of the rare alleles present in real genomes  
267 (Supplementary Figure 13). A known issue in GAN training is mode collapse (Salimans  
268 et al. 2016). Mode collapse happens when the generator fails to cover the full support  
269 of the data distribution. This failure case could explain the inability of GANs to generate  
270 rare alleles. For some applications relying on rare alleles, GAN models less sensitive  
271 to mode dropping would be a promising alternative (Arjovsky et al. 2017; Lucas et al.  
272 2018).

273

274 An important use case for the AGs in the future might be creating publicly available  
275 versions of private genome banks. Through enhancements in scientific knowledge and  
276 technology, genetic data becomes more and more sensitive in terms of privacy. AGs  
277 might offer a versatile solution to this delicate issue in the future by protecting the  
278 anonymity of real individuals. Our results showed that GAN AGs seem to be  
279 underfitting while RBM AGs seem to be overfitting based on distribution of minimum  
280 distance to the closest neighbour (Supplementary Figure 10) and  $AA_{TS}$  scores (Figure  
281 3a), although this can be investigated further by integrating  $AA_{TS}$  scores within our  
282 models as a criterion for early stopping in training (before the networks start overfitting).  
283 In the context of the privacy issue, GAN AGs have a slight advantage since underfitting  
284 is preferable. More distant AGs would hypothetically be harder to be traced back to the  
285 original genomes. We also tested the sensitivity of the  $AA_{TS}$  score and privacy loss  
286 (Supplementary Figure 14). It appears that both scores are affected very slightly when  
287 we add only a few real genomes to the AG dataset from the training set. Therefore,  
288 more sensitive measurement techniques should be developed in the future for better  
289 assessment of generated AGs. Additionally, even though we did not detect exact  
290 copies of real genomes in AG sets created either by RBM or GAN models, it is a very  
291 complicated task to determine if the generated samples can be traced back to the  
292 originals. Reliable measurements need to be developed in the future to assure  
293 complete anonymity of AGs to their source.

294  
295 Imputation results demonstrated promising outcomes especially for population specific  
296 low frequency alleles. However, imputation with both RBM and GAN AGs integrated  
297 reference panels showed slight decrease of info metric for higher frequency alleles  
298 compared to only 1000 Genomes panel (Figure 3c). We initially speculated that this  
299 might be related to the disturbance in haplotypic structure and therefore, tried to filter  
300 AGs based on chunk counts from ChromoPainter results, preserving only AGs which  
301 are below the average chunk count of real genomes. The reason behind this was to  
302 preserve most real-alike AGs with undisturbed chunks. Even with this filtering, slight  
303 decrease in higher MAF bins was still present (data not shown). Yet results of  
304 implementation with AGs for low frequency alleles and without AGs for high frequency  
305 ones could be combined to achieve best performance. In terms of imputation, future  
306 improved models can become practically very useful, largely for GWAS studies in  
307 which imputation is a common application to increase resolution. Different generative

308 models such as MaskGAN (Fedus et al. 2018) which demonstrated good results in text  
309 gap filling might also be adapted for genetic imputation. RBM is possibly another option  
310 to be used as an imputation tool directly by itself, since once the weights have been  
311 learned, it is possible to fix a subset of the visible variables and to compute the average  
312 values of the unobserved ones by sampling the probability distribution (in fact, it is  
313 even easier than sampling entirely new configurations since the fixed subset of  
314 variables will accelerate the convergence of the sampling algorithm).

315

316 As an additional feature, training an RBM to model the data distribution gives access  
317 to a latent encoding of data points, providing a potentially easier to use representation  
318 of data (Supplementary Figure 5). Future works could augment our current GAN model  
319 to also provide an encoding mechanism, in the spirit of (Dumoulin et al. 2016 Jun 2),  
320 (Chen et al. 2016) or (Donahue et al. 2016). These interpretable representations of the  
321 data are expected to be more relevant for downstream tasks (Chen et al. 2016) and  
322 could be used as a starting point for various population genetics analyses such as  
323 demographic and selection inference, or yet unknown tasks.

324

325 Although there are some current limitations, generative models will most likely become  
326 prominent for genetics in the near future with many promising applications. In this work,  
327 we demonstrated the first possible implementations and use of AGs in the forthcoming  
328 field which we would like to name artificial genomics.

## 329 **Materials & Methods**

### 330 **Data:**

331 We used 2504 individual genomes from 1000 Genomes Project (1000 Genomes  
332 Project Consortium 2015) and 1000 individuals from Estonian Biobank (Leitsalu et al.  
333 2015) to create artificial genomes (AGs). Additional 2000 Estonians were used as a  
334 test dataset. Another Estonian dataset consisting of 8678 individuals which were not  
335 used in training were used for imputation. Analyses were applied to a highly  
336 differentiated 805 SNP range selected as a subset from (Colonna et al. 2014) and a  
337 dense 10000 SNP range from chromosome 15. We also used a narrowed down  
338 version of the same region from chromosome 15 with 5000 SNPs with an additional  
339 eye color column for unphased genotype data using another 1925 Estonians as  
340 training dataset. In this set, 958 of the Estonian samples have brown (encoded as 1)  
341 and 967 have blue eyes (encoded as 0). In the data format we used, rows are  
342 individuals/haplotypes (instances) and columns are positions/SNPs (features). Each  
343 allele at each position is represented either by 0 or 1. In the case of phased data  
344 (haplotypes), each column is one position whereas in the case of unphased data, each  
345 two column corresponds to a single position with alleles from two chromosomes.

346

### 347 **GAN Model:**

348 We used python-3.6, Keras 2.2.4 deep learning library with TensorFlow backend  
349 (Chollet 2015), pandas 0.23.4 (McKinney 2010) and numpy 1.16.4 (Oliphant 2007) for  
350 the GAN code. Generator of the GAN model we present consists of an input layer with  
351 the size of the latent vector size 600, one hidden layer with size proportional to the  
352 number of SNPs as  $\text{SNP\_number}/1.2$  rounded, another hidden layer with size  
353 proportional to the number of SNPs as  $\text{SNP\_number}/1.1$  rounded and an output layer  
354 with the size of the number of SNPs. The latent vector was set with  
355 `numpy.random.normal` function setting the mean of the distribution as 0 and the  
356 standard deviation as 1. The discriminator consists of an input layer with the size of  
357 the number of SNPs, one hidden layer with size proportional to the number of SNPs  
358 as  $\text{SNP\_number}/2$  rounded, another hidden layer with size proportional to the number  
359 of SNPs as  $\text{SNP\_number}/3$  rounded and an output layer of size 1. All layer outputs  
360 except for output layers have LeakyReLU activation functions with `leaky_alpha`  
361 parameter 0.01 and L2 regularization parameter 0.0001. The generator output layer

362 activation function is tanh and discriminator output layer activation function is sigmoid.  
363 Both discriminator and combined GAN were compiled with Adam optimization  
364 algorithm with binary cross entropy loss function. We set the discriminator learning rate  
365 as 0.0008 and combined GAN learning rate as 0.0001. For 5000 SNP data, the  
366 discriminator learning rate was 0.00008 and combined GAN learning rate was 0.00001.  
367 Training to test dataset ratio was 3:1. We used batch size of 32 and trained all datasets  
368 up to 20000 epochs. We stopped training based on coherent PCA results of AGs with  
369 real genomes. During each batch, when only the discriminator is trained, we applied  
370 smoothing to the real labels (1) by vectoral addition of random uniform distribution via  
371 `numpy.random.uniform` with lower bound 0 and upper bound 0.1. Elements of the  
372 generated outputs were rounded to 0 or 1 with `numpy rint` function.

373

#### 374 **RBM Model:**

375 The RBM was coded in Julia (Bezanson et al. 2017), and all the algorithm for the  
376 training has been done by the authors. The part of the algorithm involving linear algebra  
377 used the standard package provided by Julia. Two versions of the RBM were  
378 considered. In both versions, the visible nodes were encoded using Bernoulli random  
379 variables  $\{0,1\}$ , and the size of the visible layer was the same size as the considered  
380 input. Two different types of hidden layers were considered. First with a sigmoid  
381 activation function (hence having discrete  $\{0,1\}$  hidden variables), second with ReLu  
382 (Rectified Linear unit) activations in which case the hidden variables were positive and  
383 continuous (there are distributed according to a truncated gaussian distribution when  
384 conditioning on the values of the visible variables). Results with sigmoid activation  
385 function were worse compared to ReLu so we used ReLu for all the analyses  
386 (Supplementary Figure 15). The number of hidden nodes considered for the  
387 experiment was  $N_h=100$  for the 805 SNP dataset and  $N_h=500$  for the 10k one. There  
388 is no canonical way of fixing the number of hidden nodes, in practice we checked that  
389 the number of eigenvalues learnt by the model was smaller than the number of hidden  
390 nodes, and that by adding more hidden nodes no improvement were observed during  
391 the learning. The learning in general is quite stable, in order to have a smooth learning  
392 curve, the learning rate was set between 0.001 and 0.0001 and we used batch size of  
393 32. The negative term of the gradient of the likelihood function was approximated using  
394 the PCDk method (Brügge et al. 2013), with  $k=10$  and 100 of persistent chains. As a



395 stopping criterion, we looked at when the  $AA_{TS}$  score converges to the ideal value of  
396 0.5 when sampling the learned distribution.

397

#### 398 **Bernoulli Distribution Model:**

399 We used python-3.6, pandas 0.23.4 and numpy 1.16.4 for the Bernoulli distribution  
400 model code. Each allele at a given position was randomly drawn given the derived  
401 allele frequency in the real population.

402

#### 403 **Markov Chain Model:**

404 We used python-3.6, pandas 0.23.4 and numpy 1.16.4 for the Markov chain model  
405 code. Allele at the initial position was set by drawing from a Bernoulli distribution  
406 parameterized with the real frequency. Each sequence window consisting of a given  
407 number of positions was determined by the probability of the previous sequence  
408 window. After the initial position, window size increased incrementally up to the given  
409 window size.

410

#### 411 **Chromosome Painting:**

412 We compared the haplotype sharing distribution between real and artificial  
413 chromosomes through ChromoPainter (Lawson et al. 2012). In detail, we have painted  
414 100 randomly selected “real” and “artificial” Estonians (recipients) against all the 1000  
415 Genome Project phased data (donors). The nuisance parameters  $-n$  (348.57) and  $-M$   
416 (0.00027), were estimated running 10 iterations of the expectation-maximization  
417 algorithm on a subset of 3,800 donor haplotypes.

418

#### 419 **Haplostrips:**

420 We used Haplostrips (Marnetto and Huerta-Sánchez 2017) to visualize the haplotype  
421 structure of real and artificial genomes. We extracted 500 individuals from each sample  
422 set (Real, GAN synthetics, RBM synthetics) and considered them as different  
423 populations. Black dots represent derived alleles, white ancestral. The plotted SNPs  
424 were filtered for a population specific minor allele frequency  $>5\%$ ; haplotypes were  
425 clustered and sorted for distance against the consensus haplotype from the real set.  
426 See the application article for further details about the method.

427 **Acknowledgements**

428 This work was supported by the European Union through the European Regional  
429 Development Fund (Project No. 2014-2020.4.01.16-0024, MOBTT53: LP, DM, BY;  
430 Project No. 2014-2020.4.01.16-0030: LO, FM); the Estonian Research Council grant  
431 PUT (PRG243): LP; Laboratoire de Recherche en Informatique: FJ, AD, CT, CF.

## 432 **References**

- 433
- 434 1000 Genomes Project Consortium, Auton A, Brooks LD, Durbin RM, Garrison EP,  
435 Kang HM, Korbel JO, Marchini JL, McCarthy S, McVean GA, et al. 2015. A global  
436 reference for human genetic variation. *Nature*. 526(7571):68–74.  
437 doi:10.1038/nature15393.
- 438 Adrion JR, Galloway JG, Kern AD. 2019. Inferring the landscape of recombination  
439 using recurrent neural networks. *bioRxiv*. doi:10.1101/662247.
- 440 Arjovsky M, Chintala S, Bottou L. 2017. Wasserstein generative adversarial  
441 networks. In: 34th International Conference on Machine Learning, ICML 2017.
- 442 Bezanson J, Edelman A, Karpinski S, Shah VB. 2017. Julia: A fresh approach to  
443 numerical computing. *SIAM Rev*. doi:10.1137/141000671.
- 444 Brock A, Donahue J, Simonyan K. 2018 Sep 28. Large Scale GAN Training for High  
445 Fidelity Natural Image Synthesis. <http://arxiv.org/abs/1809.11096>.
- 446 Cann HM. 2002. A Human Genome Diversity Cell Line Panel. *Science* (80- ).  
447 doi:10.1126/science.296.5566.261b.
- 448 Chen X, Duan Y, Houthoofd R, Schulman J, Sutskever I, Abbeel P. 2016. InfoGAN:  
449 Interpretable representation learning by information maximizing generative  
450 adversarial nets. In: *Advances in Neural Information Processing Systems*.
- 451 Chollet F. 2015. Keras: Deep Learning library for Theano and TensorFlow. GitHub  
452 Repos.
- 453 Colonna V, Ayub Q, Chen Y, Pagani L, Luisi P, Pybus M, Garrison E, Xue Y, Tyler-  
454 Smith C, Abecasis GR, et al. 2014. Human genomic regions with exceptionally high  
455 levels of population differentiation identified from 911 whole-genome sequences.  
456 *Genome Biol*. doi:10.1186/gb-2014-15-6-r88.
- 457 Davidsen K, Olson BJ, DeWitt WS, Feng J, Harkins E, Bradley P, Matsen FA. 2019.  
458 Deep generative models for T cell receptor protein sequences. *Elife*. 8.  
459 doi:10.7554/eLife.46935. <https://elifesciences.org/articles/46935>.
- 460 Diaz-Papkovich A, Anderson-Trocme L, Gravel S. 2019. Revealing multi-scale  
461 population structure in large cohorts. *bioRxiv*. doi:10.1101/423632.
- 462 Donahue J, Krähenbühl P, Darrell T. 2016 May 31. Adversarial Feature Learning.  
463 <http://arxiv.org/abs/1605.09782>.
- 464 Dumoulin V, Belghazi I, Poole B, Mastropietro O, Lamb A, Arjovsky M, Courville A.  
465 2016 Jun 2. Adversarially Learned Inference. <http://arxiv.org/abs/1606.00704>.
- 466 Eriksson N, Macpherson JM, Tung JY, Hon LS, Naughton B, Saxonov S, Avey L,  
467 Wojcicki A, Pe'er I, Mountain J. 2010. Web-based, participant-driven studies yield  
468 novel genetic associations for common traits. *PLoS Genet*.  
469 doi:10.1371/journal.pgen.1000993.
- 470 Fedus W, Goodfellow I, Dai AM. 2018 Jan 23. MaskGAN: Better Text Generation via  
471 Filling in the \_\_\_\_\_. <http://arxiv.org/abs/1801.07736>.
- 472 Flagel L, Brandvain Y, Schrider DR. 2019. The unreasonable effectiveness of  
473 convolutional neural networks in population genetic inference. *Mol Biol Evol*.  
474 doi:10.1093/molbev/msy224.
- 475 Goodfellow I, Pouget-Abadie J, Mirza M. 2014. Generative Adversarial Networks

- 476 (GANs) - Tutorial. *Neural Inf Process Syst.*
- 477 Gurdasani D, Carstensen T, Tekola-Ayele F, Pagani L, Tachmazidou I, Hatzikotoulas  
478 K, Karthikeyan S, Iles L, Pollard MO, Choudhury A, et al. 2015. The African Genome  
479 Variation Project shapes medical genetics in Africa. *Nature.*  
480 doi:10.1038/nature13997.
- 481 Han J, Kraft P, Nan H, Guo Q, Chen C, Qureshi A, Hankinson SE, Hu FB, Duffy DL,  
482 Zhen ZZ, et al. 2008. A genome-wide association study identifies novel alleles  
483 associated with hair color and skin pigmentation. *PLoS Genet.*  
484 doi:10.1371/journal.pgen.1000074.
- 485 Hinton GE. 2007. Learning multiple layers of representation. *Trends Cogn Sci.*  
486 doi:10.1016/j.tics.2007.09.004.
- 487 Hinton GE, Salakhutdinov RR. 2006. Reducing the dimensionality of data with neural  
488 networks. *Science (80- ).* doi:10.1126/science.1127647.
- 489 Howie B, Marchini J, Stephens M. 2011. Genotype imputation with thousands of  
490 genomes. *G3 Genes, Genomes, Genet.* doi:10.1534/g3.111.001198.
- 491 Kingma DP, Welling M. 2013 Dec 20. Auto-Encoding Variational Bayes.  
492 <http://arxiv.org/abs/1312.6114>.
- 493 Larochelle H, Bengio Y. 2008. Classification using discriminative restricted boltzmann  
494 machines. In: *Proceedings of the 25th International Conference on Machine*  
495 *Learning.*
- 496 Lawson DJ, Hellenthal G, Myers S, Falush D. 2012. Inference of population structure  
497 using dense haplotype data. *PLoS Genet.* 8(1):11–17.  
498 doi:10.1371/journal.pgen.1002453.
- 499 Ledig C, Theis L, Huszár F, Caballero J, Cunningham A, Acosta A, Aitken A, Tejani  
500 A, Totz J, Wang Z, et al. 2017. Photo-realistic single image super-resolution using a  
501 generative adversarial network. In: *Proceedings - 30th IEEE Conference on*  
502 *Computer Vision and Pattern Recognition, CVPR 2017.*
- 503 Leitsalu L, Haller T, Esko T, Tammesoo ML, Alavere H, Snieder H, Perola M, Ng PC,  
504 Mägi R, Milani L, et al. 2015. Cohort profile: Estonian biobank of the Estonian  
505 genome center, university of Tartu. *Int J Epidemiol.* doi:10.1093/ije/dyt268.
- 506 Libbrecht MW, Noble WS. 2015. Machine learning applications in genetics and  
507 genomics. *Nat Rev Genet.* doi:10.1038/nrg3920.
- 508 Liu Q, Lv H, Jiang R. 2019. HicGAN infers super resolution Hi-C data with generative  
509 adversarial networks. In: *Bioinformatics. Vol. 35. Oxford University Press.* p. i99–  
510 i107.
- 511 Lucas T, Tallec C, Verbeek J, Ollivier Y. 2018. Mixed batches and symmetric  
512 discriminators for GAN training. In: *35th International Conference on Machine*  
513 *Learning, ICML 2018.*
- 514 Mallick S, Li H, Lipson M, Mathieson I, Gymrek M, Racimo F, Zhao M, Chennagiri N,  
515 Nordenfelt S, Tandon A, et al. 2016. The Simons Genome Diversity Project: 300  
516 genomes from 142 diverse populations. *Nature.* doi:10.1038/nature18964.
- 517 Mardis ER. 2017. DNA sequencing technologies: 2006-2016. *Nat Protoc.*  
518 doi:10.1038/nprot.2016.182.
- 519 Marnetto D, Huerta-Sánchez E. 2017. Haplostrips: revealing population structure

- 520 through haplotype visualization. *Methods Ecol Evol.* 8(10):1389–1392.  
521 doi:10.1111/2041-210X.12747.
- 522 McKinney W. 2010. Data Structures for Statistical Computing in Python. In:  
523 Proceedings of the 9th Python in Science Conference.
- 524 Mitt M, Kals M, Pärn K, Gabriel SB, Lander ES, Palotie A, Ripatti S, Morris AP,  
525 Metspalu A, Esko T, et al. 2017. Improved imputation accuracy of rare and low-  
526 frequency variants using population-specific high-coverage WGS-based imputation  
527 reference panel. *Eur J Hum Genet.* doi:10.1038/ejhg.2017.51.
- 528 Oliphant TE. 2007. SciPy: Open source scientific tools for Python. *Comput Sci Eng.*  
529 Popejoy AB, Fullerton SM. 2016. Genomics is failing on diversity. *Nature.*  
530 doi:10.1038/538161a.
- 531 Radford A, Metz L, Chintala S. 2016. Unsupervised Representation learning with  
532 Deep Convolutional GANs. *Int Conf Learn Represent.* doi:10.1051/0004-  
533 6361/201527329.
- 534 Rolnick D, Dyer EL. 2019. Generative models and abstractions for large-scale  
535 neuroanatomy datasets. *Curr Opin Neurobiol.* doi:10.1016/j.conb.2019.02.005.
- 536 Salimans T, Goodfellow I, Zaremba W, Cheung V, Radford A, Chen X. 2016.  
537 Improved techniques for training GANs. In: *Advances in Neural Information*  
538 *Processing Systems.*
- 539 Sheehan S, Song YS. 2016. Deep Learning for Population Genetic Inference. *PLoS*  
540 *Comput Biol.* 12(3):1–28. doi:10.1371/journal.pcbi.1004845.
- 541 Sirugo G, Williams SM, Tishkoff SA. 2019. The Missing Diversity in Human Genetic  
542 Studies. *Cell.* doi:10.1016/j.cell.2019.02.048.
- 543 Smolensky P. 1986. Information processing in dynamical systems: Foundations of  
544 harmony theory. In: *Parallel Distributed Processing Explorations in the Microstructure*  
545 *of Cognition.*
- 546 Teh YW, Hinton GE. 2001. Rate-coded restricted boltzmann machines for face  
547 recognition. In: *Advances in Neural Information Processing Systems.*
- 548 Yale A, Dash S, Dutta R, Guyon I, Pavao A, Bennett K. 2019 Apr 24. Privacy  
549 Preserving Synthetic Health Data. <https://hal.inria.fr/hal-02160496/>.
- 550 Zhang H, Xu T, Li H, Zhang S, Wang X, Huang X, Metaxas D. 2017. StackGAN: Text  
551 to Photo-Realistic Image Synthesis with Stacked Generative Adversarial Networks.  
552 In: *Proceedings of the IEEE International Conference on Computer Vision.*
- 553 Zhang M, Song F, Liang L, Nan H, Zhang J, Liu H, Wang LE, Wei Q, Lee JE, Amos  
554 CI, et al. 2013. Genome-wide association studies identify several new loci associated  
555 with pigmentation traits and skin cancer risk in European Americans. *Hum Mol*  
556 *Genet.* doi:10.1093/hmg/ddt142.
- 557
