# 1 Creating Artificial Human Genomes Using Generative 2 Models

3  
4 **Authors:** Burak Yelmen<sup>1,2,\*</sup>, Aurélien Decelle<sup>3</sup>, Linda Ongaro<sup>1,2</sup>, Davide Marnetto<sup>1</sup>, Corentin  
5 Tallec<sup>3</sup>, Francesco Montinaro<sup>1,4</sup>, Cyril Furtlehner<sup>3</sup>, Luca Pagani<sup>1,5</sup>, Flora Jay<sup>3,\*</sup>

## 6 **Affiliations:**

7  
8 *1 Institute of Genomics, University of Tartu, Estonia*

9 *2 Institute of Molecular and Cell Biology, University of Tartu, Estonia*

10 *3 Laboratoire de Recherche en Informatique, CNRS UMR 8623, Université Paris-Sud,*  
11 *Université Paris-Saclay, Orsay, France*

12 *4 Department of Zoology, University of Oxford, UK*

13 *5 APE Lab, Department of Biology, University of Padova, Italy*

14 *\*to whom correspondence should be addressed: [burakyelmen@gmail.com](mailto:burakyelmen@gmail.com), [flora.jay@lri.fr](mailto:flora.jay@lri.fr)*

15 **Abstract**

16 Generative models have shown breakthroughs in a wide spectrum of domains due to  
17 recent advancements in machine learning algorithms and increased computational  
18 power. Despite these impressive achievements, the ability of generative models to  
19 create realistic synthetic data is still under-exploited in genetics and absent from  
20 population genetics.

21

22 Yet a known limitation of this field is the reduced access to many genetic databases  
23 due to concerns about violations of individual privacy, although they would provide a  
24 rich resource for data mining and integration towards advancing genetic studies. In this  
25 study, we demonstrated that deep generative adversarial networks (GANs) and  
26 restricted Boltzmann machines (RBMs) can be trained to learn the high dimensional  
27 distributions of real genomic datasets and create high quality artificial genomes (AGs)  
28 with none to little privacy loss. To illustrate the promising outcomes of our method, we  
29 showed that (i) imputation quality for low frequency alleles can be improved by  
30 augmenting reference panels with AGs, (ii) scores obtained from selection tests on  
31 AGs and real genomes are highly correlated and (iii) AGs can inherit genotype-  
32 phenotype associations. AGs have the potential to become valuable assets in genetic  
33 studies by providing high quality anonymous substitutes for private databases.

34

## 35 **Introduction**

36 Availability of genetic data has increased tremendously due to advances in sequencing  
37 technologies and reduced costs (Mardis 2017). The vast amount of human genetic  
38 data is used in a wide range of fields, from medicine to evolution. Despite the  
39 advances, cost is still a limiting factor and more data is always welcomed, especially  
40 in population genetics and genome-wide association studies (GWAS) which usually  
41 require substantial amounts of samples. Partially related to the costs but also to the  
42 research bias toward studying populations of European ancestry, many autochthonous  
43 populations are under-represented in genetic databases, diminishing the extent of the  
44 resolution in many studies (Cann 2002; Popejoy and Fullerton 2016; Mallick et al.  
45 2016; Sirugo et al. 2019). Additionally, a huge portion of the data held by government  
46 institutions and private companies is considered sensitive and not easily accessible  
47 due to privacy issues, exhibiting yet another barrier for scientific work. A class of  
48 machine learning methods called generative models might provide a suitable solution  
49 to these problems.

50  
51 Generative models are used in unsupervised machine learning to discover intrinsic  
52 properties of data and produce new data points based on those. In the last decade,  
53 generative models have been studied and applied in many domains of machine  
54 learning (Libbrecht and Noble 2015; Zhang et al. 2017; Rolnick and Dyer 2019). There  
55 have also been a few applications in the genetics field (Davidsen et al. 2019; Liu et al.  
56 2019; Tubiana et al. 2019; Shimagaki and Weigt 2019), one specific study focusing on  
57 generating DNA sequences via deep generative models to capture protein binding  
58 properties (Killoran et al. 2017). Among the various generative approaches, we focus  
59 on two of them in this study, generative adversarial networks (GANs) and restricted  
60 Boltzmann machines (RBMs). GANs are generative neural networks which are  
61 capable of learning complex data distributions in a variety of domains (Goodfellow et  
62 al. 2014). A GAN consists of two neural networks, a generator and a discriminator,  
63 which compete in a zero-sum game (Supplementary Figure 1). During training, the  
64 generator produces new instances while the discriminator evaluates their authenticity.  
65 The training objective consists in learning the data distribution in a way such that the  
66 new instances created by the generator cannot be distinguished from true data by the  
67 discriminator. Since their first introduction, there have been several successful

68 applications of GANs, ranging from generating high quality realistic imagery to gap  
69 filling in texts (Ledig et al. 2017; Fedus et al. 2018). GANs are currently the state-of-  
70 the-art models for generating realistic images (Brock et al. 2018).

71

72 A restricted Boltzmann machine, initially called Harmonium is another generative  
73 model which is a type of neural network capable of learning probability distributions  
74 through input data (Smolensky 1986; Teh and Hinton 2001). RBMs are two layer neural  
75 networks consisting of an input (visible) layer and a hidden layer (Supplementary  
76 Figure 2). The learning procedure for the RBM consists in maximizing the likelihood  
77 function over the visible variables of the model. This procedure is done by adjusting  
78 the weights such that the correlations between the visible and hidden variables on both  
79 the dataset and sampled configurations from the RBM converge. Then RBM models  
80 recreate data in an unsupervised manner through many forward and backward passes  
81 between these two layers (Gibbs sampling), corresponding to sampling from the  
82 learned distribution. The output of the hidden layer goes through an activation function,  
83 which in return becomes the input for the hidden layer. Although mostly overshadowed  
84 by recently introduced approaches such as GANs or Variational Autoencoders  
85 (Kingma and Welling 2013), RBMs have been used effectively for different tasks (such  
86 as collaborative filtering for recommender systems, image or document classification)  
87 and are the main components of deep belief networks (Hinton and Salakhutdinov 2006;  
88 Hinton 2007; Larochelle and Bengio 2008).

89

90 Here we propose and compare a prototype GAN model along with an RBM model to  
91 create Artificial Genomes (AGs) which can mimic real genomes and capture population  
92 structure along with other characteristics of real genomes. We envision two main  
93 applications of our generative methods: (i) improving the performance of genomic  
94 tasks such as imputation, ancestry reconstruction, GWAS studies, by augmenting  
95 genomic panels with AGs serving as proxies for private datasets, (ii) demonstrating  
96 that a proper encoding of the genomic data can be learned and possibly used as a  
97 starting input of various inference tasks by combining this encoding with recent neural  
98 network-based tools for the reconstruction of recombination, demography or selection  
99 (Sheehan and Song 2016; Adrion et al. 2019; Flagel et al. 2019).

## 100 **Results**

### 101 **Reconstructing genome wide population structure:**

102 Initially we created AGs with GAN, RBM, and two simple generative models for  
103 comparison: a Bernoulli and a Markov chain model (see Materials & Methods) using  
104 2504 individuals (5008 haplotypes) from 1000 Genomes data (1000 Genomes Project  
105 Consortium et al. 2015), spanning 805 SNPs from all chromosomes which reflect a  
106 high proportion of the population structure present in the whole dataset (Colonna et al.  
107 2014). Both GAN and RBM models capture a good portion of the population structure  
108 present in 1000 Genomes data while the other two models could only produce  
109 instances centered around 0 on principal component analysis (PCA) space (Figure 1).  
110 All major modes, corresponding to African, European and Asian genomes, are well  
111 represented in AGs produced by GAN and RBM models. Uniform manifold  
112 approximation and projection (UMAP) mapping results also correlate with the  
113 performed PCA (Supplementary Figure 3). We additionally checked the distribution of  
114 pairwise differences of haploid genomes to see how different AGs are from real  
115 genomes (Supplementary Figure 4). Both RBM and GAN models have highly similar  
116 distributions to the distribution of pairwise differences of the real genomes within  
117 themselves. Especially RBM excels at replicating the real peaks, indicating a high  
118 similarity with real genomes. Since GANs and RBMs showed an excellent performance  
119 for this use case, we further explored other characteristics using only these two  
120 models.

121 **Figure 1.** The six first axes of a PCA applied to real (gray) and artificial genomes (AGs)  
122 generated via Bernoulli (green), Markov chain (purple), GAN (blue) and RBM (red)  
123 models. There are 5000 haplotypes for each AG dataset and 5008 (2504 genomes)  
124 for the real dataset from 1000 Genomes spanning 805 informative SNPs. See  
125 Materials & Methods for detailed explanation of the generation procedures.

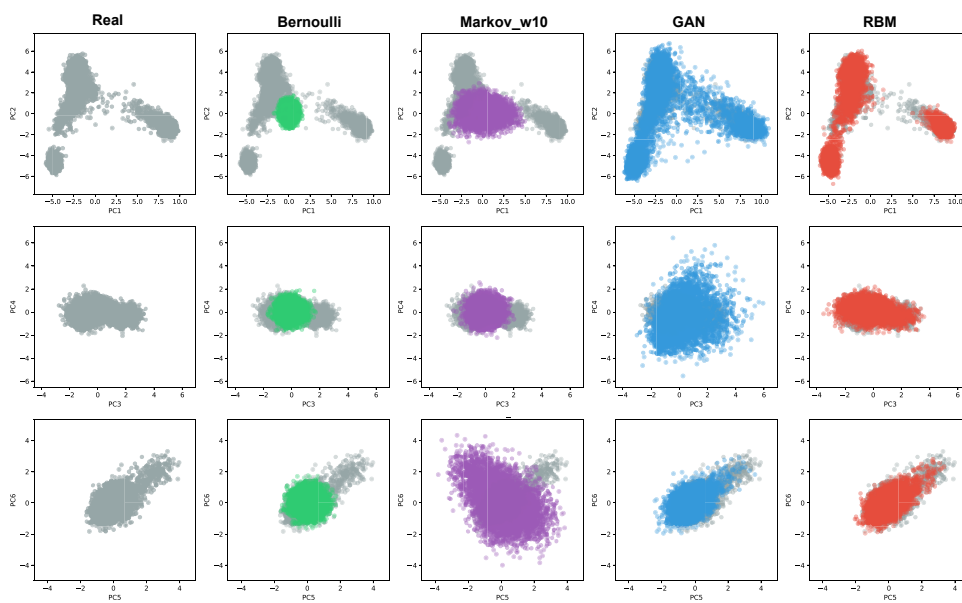

126  
127  
128 Furthermore, similarly to tSNE and UMAP, RBMs perform a non-linear dimension  
129 reduction of the data and provides a suitable representation of a genomic dataset as  
130 a by-product based on the non-linear feature space associated to the hidden layer  
131 (Supplementary Text). As Diaz-Papkovich et al (Diaz-Papkovich et al. 2019), we found  
132 that the RBM representation differs from the linear PCA ones. Here we plot the  
133 representation corresponding to the selected RBM model and exhibit its rapid evolution  
134 through training (Supplementary Figure 5).

135  
136 Supplementary Figure 5 shows that African, East Asian, and to a lesser extent,  
137 European populations stand out on the two first components. The Finnish are slightly  
138 isolated from the other European (similar to Peruvian from American) populations on  
139 the first two components. South Asians are located at the center separated from  
140 Europeans, partially overlapping with American populations, and stand out at  
141 dimension 5 and higher. Interestingly when screening the hidden node activations, we  
142 observed that different populations or groups activate different hidden nodes, each one

143 representing a specific combination of SNPs, thereby confirming that the hidden layer  
144 provides a meaningful encoding of the data (Supplementary Figure 6).

145

#### 146 **Reconstructing local high-density haplotype structure:**

147 To evaluate if high quality artificial dense genome sequences can also be created by  
148 generative models, we applied the GAN and RBM methods to a 10K SNP region using  
149 (i) the same individuals from 1000 Genomes data and (ii) 1000 Estonian individuals  
150 from the high coverage Estonian Biobank (Leitsalu et al. 2015) to generate artificial  
151 genomes. PCA results of AGs spanning consecutive 10K SNPs show that both GAN  
152 and RBM models can still capture the relatively toned-down population structure  
153 (Supplementary Figure 7) as well as the overall distribution of pairwise distances  
154 (Supplementary Figure 8). Looking at the allele frequency comparison between real  
155 and artificial genomes, we see that especially GAN performs poorly for low frequency  
156 alleles, due to a lack of representation of these alleles in the AGs (Supplementary  
157 Figure 9). On the other hand, the distribution of the distance of real genomes to the  
158 closest AG neighbour shows that GAN model, although slightly underfitting,  
159 outperforms RBM model, for which an excess of small distances points towards slight  
160 overfitting (Supplementary Figure 10).

161

162 Additionally, we performed linkage disequilibrium (LD) analyses comparing artificial  
163 and real genomes to assess how successfully the AGs imitate short and long range  
164 correlations between SNPs. Pairwise LD matrices for real and artificial genomes all  
165 show a similar block pattern demonstrating that GAN and RBM accurately captured  
166 the overall structure with SNPs having higher linkage in specific regions (Figure 2a).  
167 However, plotting LD as a function of the SNP distance showed that all models capture  
168 weaker correlation, with RBM outperforming the GAN model perhaps due to its slightly  
169 overfitting characteristic (Figure 2b). To further determine the haplotypic integrity of  
170 AGs, we performed ChromoPainter (Lawson et al. 2012) and Haplostrips (Marnetto  
171 and Huerta-Sánchez 2017) analyses on AGs created using Estonians as the training  
172 data. It was visually impossible to distinguish the difference between real and artificial  
173 genomes in terms of local haplotypic structure with Haplostrips (Supplementary Figure  
174 11). However, majority of the AGs produced via GAN model displayed an excess of  
175 short chunks when painted against 1000 Genomes individuals, whereas RBM AGs  
176 were nearly indistinguishable from real genomes (Supplementary Figure 12).



177 **Figure 2.** Linkage disequilibrium (LD) analysis on real and artificial Estonian genomes.  
178 **a)** Correlation ( $r^2$ ) matrices of SNPs. Lower triangular parts are SNP pairwise  
179 correlation in real genomes and upper triangular parts are SNP pairwise correlation in  
180 artificial genomes. **b)** LD as a function of SNP distance. Pairwise SNP distances were  
181 stratified into 50 bins and for each distance bin, the correlation was averaged over all  
182 pairs of SNPs belonging to the bin.  
183

a.

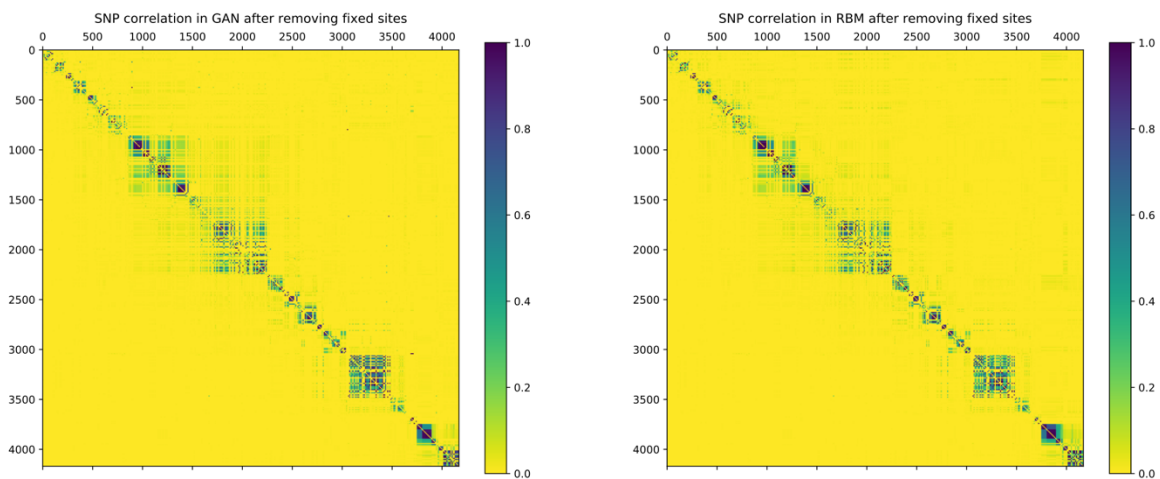

b.

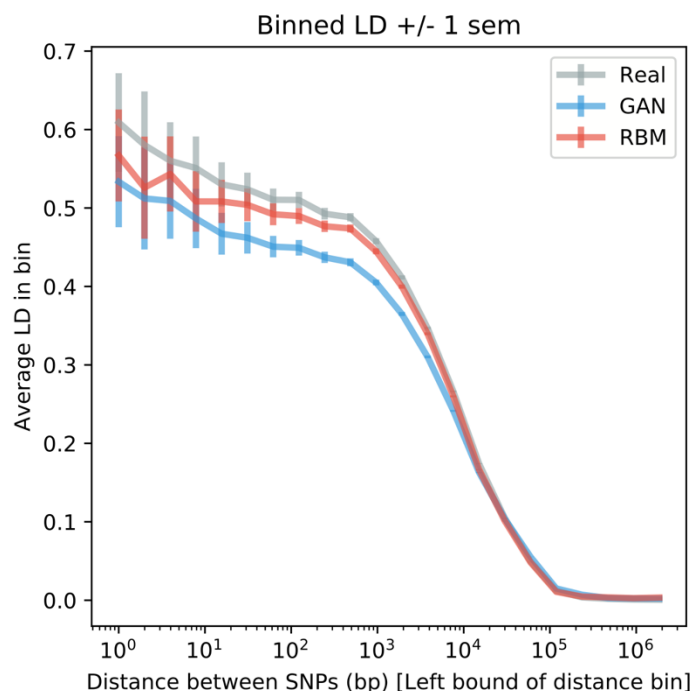

184  
185



186 After demonstrating that our models generated realistic AGs according to the  
187 described summary statistics, we investigated further whether they respected privacy  
188 by measuring the extent of overfitting. We calculated two metrics of resemblance and  
189 privacy, the nearest neighbour adversarial accuracy (AA<sub>TS</sub>) and privacy loss presented  
190 in a recent study (Yale et al. 2019). AA<sub>TS</sub> score measures whether two datasets were  
191 generated by the same distribution based on the distances between all data points and  
192 their nearest neighbours in each set. When applied to artificial and real datasets, a  
193 score between 0.5 and 1 indicates underfitting, between 0 and 0.5 overfitting (and likely  
194 privacy loss), and exactly 0.5 indicates that the datasets are indistinguishable. By using  
195 an additional real test set, it is also possible to calculate a privacy loss score that is  
196 positive in case of information leakage, negative otherwise, and approximately ranges  
197 from -0.5 to 0.5. Computed on our generated data, both scores support haplotypic  
198 pairwise difference results confirming the underfitting nature of GAN AGs and slightly  
199 overfitting nature of RBM AGs with a small risk of privacy leakage for the latter  
200 (Supplementary Figure 13).

201

202 Since it has been shown in previous studies that imputation scores can be improved  
203 using additional population specific reference panels (Gurdasani et al. 2015; Mitt et al.  
204 2017), as a possible future use case, we tried imputing real Estonian genomes using  
205 1000 Genomes reference panel and additional artificial reference panels with Impute2  
206 software (Howie et al. 2011). Both combined RBM AG and combined GAN AG panels  
207 outperformed 1000 Genomes panel for the lowest MAF bin (for MAF < 0.05, 0.015 and  
208 0.024 improvement respectively) which had 5926 SNPs out of 9230 total (Figure 3).  
209 Also mean info metric over all SNPs was 0.009 and 0.015 higher for combined RBM  
210 and GAN panels respectively, compared to the panel with only 1000 Genomes  
211 samples. However, aside from the lowest MAF bin, 1000 Genomes panel  
212 outperformed both concatenated panels for all the higher bins. This might be a  
213 manifestation of haplotypic deformities in AGs that might have disrupted the imputation  
214 algorithm.

215

216 **Figure 3.** Imputation evaluation of three different reference panels based on Impute2  
217 software's info metric. Imputation was performed on 8678 Estonian individuals (which  
218 were not used in training of GAN and RBM models) using only 1000 Genomes panel  
219 (gray), combined 1000 Genomes and GAN artificial genomes panel (blue) and  
220 combined 1000 Genomes and RBM artificial genomes panel (red). SNPs were divided  
221 into 10 MAF bins, from 0.05 to 0.5, after which mean info metric values were calculated.  
222 Bars in the zoomed section show the standard error of mean.

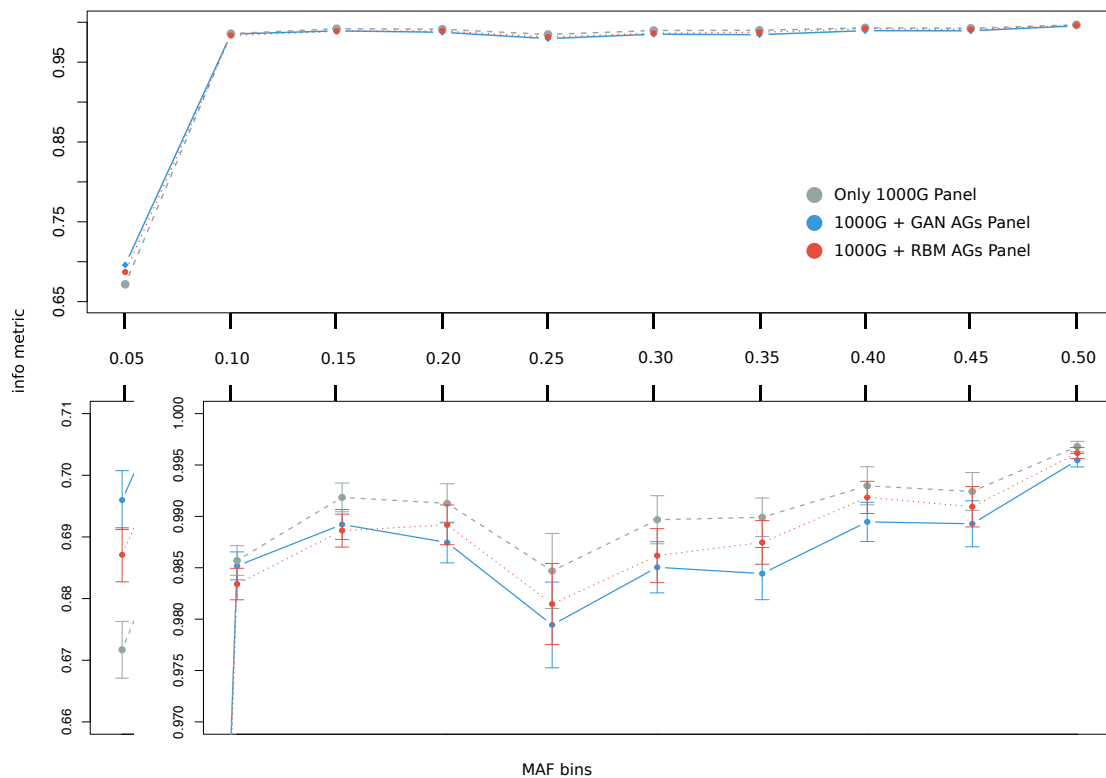

223

224

### 225 Selection tests:

226 We additionally performed cross population extended haplotype homozygosity (XP-  
227 EHH) and population branch statistic (PBS) on a 3348 SNP region homogenously  
228 dispersed over chromosome 15 to assess if AGs can also be used for selection tests.  
229 Both XP-EHH and PBS results provided high correlation between the scores of real  
230 and artificial genomes (Figure 4). The peaks observed in real genome scores which  
231 might indicate possible selection signals were successfully captured by AGs.

232

233 **Figure 4.** Selection tests on chromosome 15. a) Standardized XP-EHH scores of real  
234 and artificial Estonian genomes using 1000 Genomes Yoruba population (YRI) as the

235 complementary population. Correlation coefficient between real and GAN XP-EHH  
236 score is 0.902, between real and RBM XP-EHH score is 0.887. **b)** PBS scores of real  
237 and artificial Estonian genomes using 1000 Genomes Yoruba (YRI) and Japanese  
238 (JPT) populations as the complementary populations. PBS window size is 10 and step  
239 size is 5. Dotted black line corresponds to the 99<sup>th</sup> percentile. Correlation coefficient  
240 between real and GAN PBS score is 0.923, between real and RBM PBS score is 0.755.  
241 Highest peaks are marked by an asterisk.  
242

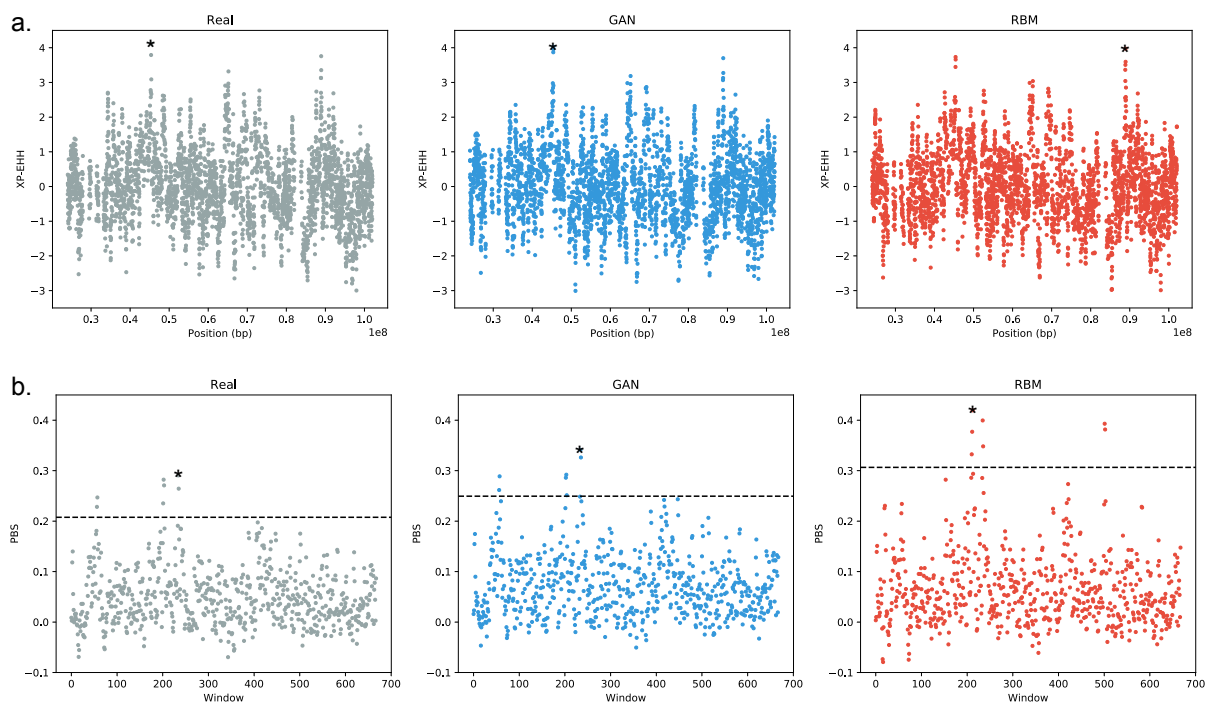

243

244

245

## 246 **Linking genotypes with phenotypes:**

247 We then explored the possibility of creating AGs with unphased genotype data and  
248 recreating phenotype-genotype associations using generative models. As a proof of  
249 concept, we created GAN AGs via training on 1925 Estonian individuals with 5000  
250 SNPs using unphased genotypes instead of haplotypes. There was an additional  
251 column in this dataset representing eye color (blue or brown). This region  
252 encompasses rs12913832 SNP which is highly associated with eye color phenotype  
253 (Han et al. 2008; Eriksson et al. 2010; Zhang et al. 2013). In our real genome dataset,  
254 nearly 96% of the individuals possessing at least one ancestral allele (A) have brown  
255 eye color while this percentage is 80% in GAN AGs. Similarly, 97% of all blue-eyed  
256 real individuals and 88% of the artificial ones are homozygous for the derived allele

257 (G). No blue-eyed individuals are homozygous for the ancestral alleles in the real  
258 dataset and only 9 individuals out of the 1925 GAN AGs were homozygous ancestral  
259 with blue eyes (Supplementary Table). Chi-square tests based on the contingency  
260 tables were highly significant for both the real and artificial datasets ( $p$ -values  $< 2.2e$ -  
261 16 ; Supplementary Table 1). These results suggest that AGs were able to reproduce  
262 the genotypic-phenotypic association existing in the real dataset. We could not detect  
263 the same association in the RBM AG dataset (see Discussion).

## 264 Discussion

265 In this study, we applied generative models to produce artificial genomes and  
266 evaluated their characteristics. To the best of our knowledge, this is the first application  
267 of GAN and RBM models in population genetics context, displaying overall promising  
268 applicability. We showed that population structure and frequency-based features of  
269 real populations can successfully be preserved in AGs created using GAN and RBM  
270 models. Furthermore, both models can be applied to sparse or dense SNP data given  
271 a large enough number of training individuals. Our different trials showed that the  
272 minimum required number of individuals for training is highly variable, possibly  
273 correlated with the diversity among individuals (data not shown). Since haplotype data  
274 is more informative, we created haplotypes for the analyses but we also demonstrated  
275 that the GAN model can be applied to genotype data too, by simply combining two  
276 haplotypes if the training data is not phased (see Materials & Methods). In addition, we  
277 showed that it is possible to generate AGs with simple phenotypic traits through  
278 genotype data (see Results). Even though there were only two simple classes, blue  
279 and brown eye color phenotypes, generative models can be improved in the future to  
280 hold the capability to produce artificial datasets combining AGs with multiple  
281 phenotypes. The training of the RBM in this case did not work properly. We believe  
282 that it is because the encoding of the phenotype is not well-suited for the RBM. Further  
283 investigation on that part would be out of the scope of this article, but we suspect that  
284 an encoding of the type "one-hot" vector addition of a stronger learning rate for the  
285 weights linked to the phenotype nodes could improve the training.

286  
287 One major drawback of the proposed models is that, due to computational limitations,  
288 they cannot yet be harnessed to create whole artificial genomes but rather snippets or  
289 sequential dense chunks. Although parallel computing might be a solution, this might  
290 further disrupt the haplotype structure in AGs. Instead, adapting convolutional GANs  
291 for AG generation might be a possible solution in the future (Radford et al. 2016).  
292 Another problem arose due to rare alleles, especially for the GAN model. We showed  
293 that nearly half of the alleles become fixed in the GAN AGs in the 10K SNP dataset,  
294 whereas RBM AGs capture more of the rare alleles present in real genomes  
295 (Supplementary Figure 14). A known issue in GAN training is mode collapse (Salimans  
296 et al. 2016), which occurs when the generator fails to cover the full support of the data

297 distribution. This failure case could explain the inability of GANs to generate rare  
298 alleles. For some applications relying on rare alleles, GAN models less sensitive to  
299 mode dropping would be a promising alternative (Arjovsky et al. 2017; Lucas et al.  
300 2018).

301

302 An important use case for the AGs in the future might be creating publicly available  
303 versions of private genome banks. Through enhancements in scientific knowledge and  
304 technology, genetic data becomes more and more sensitive in terms of privacy. AGs  
305 might offer a versatile solution to this delicate issue in the future by protecting the  
306 anonymity of real individuals. Our results showed that GAN AGs are possibly  
307 underfitting while, on the contrary, RBM AGs are slightly overfitting, based on  
308 distribution of minimum distance to the closest neighbour (Supplementary Figure 10)  
309 and AA<sub>TS</sub> scores (Supplementary Figure 13a), although we showed how overfitting  
310 could be restrained by integrating AA<sub>TS</sub> scores within our models as a criterion for early  
311 stopping in training (before the networks start overfitting). In the context of the privacy  
312 issue, GAN AGs have a slight advantage since underfitting is preferable. More distant  
313 AGs would hypothetically be harder to be traced back to the original genomes. We  
314 also tested the sensitivity of the AA<sub>TS</sub> score and privacy loss (Supplementary Figure  
315 15). It appears that both scores are affected very slightly when we add only a few real  
316 genomes to the AG dataset from the training set. Although this case is easily detectable  
317 by examining the extreme left tail of the pairwise distribution, it advocates for combining  
318 multiple privacy loss criteria and developing other sensitive measurement techniques  
319 for better assessment of generated AGs. Additionally, even though we did not detect  
320 exact copies of real genomes in AG sets created either by RBM or GAN models, it is  
321 a very complicated task to determine if the generated samples can be traced back to  
322 the originals. Reliable measurements need to be developed in the future to assure  
323 complete anonymity of the source individuals given the released AGs. In particular, we  
324 will investigate whether the differential privacy framework is performant in the context  
325 of large population genomics datasets (Dwork et al. 2006; Torkzadehmahani et al.  
326 2019).

327

328 Imputation results demonstrated promising outcomes especially for population specific  
329 low frequency alleles. However, imputation with both RBM and GAN AGs integrated  
330 reference panels showed slight decrease of info metric for higher frequency alleles

331 compared to only 1000 Genomes panel (Figure 3). We initially speculated that this  
332 might be related to the disturbance in haplotypic structure and therefore, tried to filter  
333 AGs based on chunk counts from ChromoPainter results, preserving only AGs which  
334 are below the average chunk count of real genomes. The reasoning behind this was  
335 to preserve most real-alike AGs with undisturbed chunks. Even with this filtering, slight  
336 decrease in higher MAF bins was still present (data not shown). Yet results of  
337 implementation with AGs for low frequency alleles and without AGs for high frequency  
338 ones could be combined to achieve best performance. In terms of imputation, future  
339 improved models can become practically very useful, largely for GWAS studies in  
340 which imputation is a common application to increase resolution. Different generative  
341 models such as MaskGAN (Fedus et al. 2018) which demonstrated good results in text  
342 gap filling might also be adapted for genetic imputation. RBM is possibly another option  
343 to be used as an imputation tool directly by itself, since once the weights have been  
344 learned, it is possible to fix a subset of the visible variables and to compute the average  
345 values of the unobserved ones by sampling the probability distribution (in fact, it is  
346 even easier than sampling entirely new configurations since the fixed subset of  
347 variables will accelerate the convergence of the sampling algorithm).

348

349 Scans for detecting selection are another promising use case for AGs. The XP-EHH  
350 and PBS scores computed on AGs were highly correlated with the scores of real  
351 genomes. In particular, the highest peak we obtained for Estonian genomes was also  
352 present in AGs, although it was the second highest peak in RBM XP-EHH plot (Figure  
353 4). This peak falls within the range of skin color associated *SLC24A5* gene, which is  
354 potentially under positive selection in many European populations (Basu Mallick et al.  
355 2013).

356

357 As an additional feature, training an RBM to model the data distribution gives access  
358 to a latent encoding of data points, providing a potentially easier to use representation  
359 of data (Supplementary Figure 5). Future works could augment our current GAN model  
360 to also provide an encoding mechanism, in the spirit of (Dumoulin et al. 2016 Jun 2),  
361 (Chen et al. 2016) or (Donahue et al. 2016). These interpretable representations of the  
362 data are expected to be more relevant for downstream tasks (Chen et al. 2016) and  
363 could be used as a starting point for various population genetics analyses such as  
364 demographic and selection inference, or yet unknown tasks.



365

366 Although there are some current limitations, generative models will most likely become  
367 prominent for genetics in the near future with many promising applications. In this work,  
368 we demonstrated the first possible implementations and use of AGs in the forthcoming  
369 field which we would like to name artificial genomics.

## 370 **Materials & Methods**

### 371 **Data:**

372 We used 2504 individual genomes from 1000 Genomes Project (1000 Genomes  
373 Project Consortium 2015) and 1000 individuals from Estonian Biobank (Leitsalu et al.  
374 2015) to create artificial genomes (AGs). Additional 2000 Estonians were used as a  
375 test dataset. Another Estonian dataset consisting of 8678 individuals which were not  
376 used in training were used for imputation. Analyses were applied to a highly  
377 differentiated 805 SNPs selected as a subset from (Colonna et al. 2014), 3348 SNPs  
378 dispersed over the whole chromosome 15 and a dense 10000 SNP range/region from  
379 chromosome 15. We also used a narrowed down version of the same region from  
380 chromosome 15 with 5000 SNPs with an additional eye color column for unphased  
381 genotype data using another 1925 Estonians as training dataset. In this set, 958 of the  
382 Estonian samples have brown (encoded as 1) and 967 have blue eyes (encoded as  
383 0). In the data format we used, rows are individuals/haplotypes (instances) and  
384 columns are positions/SNPs (features). Each allele at each position is represented  
385 either by 0 or 1. In the case of phased data (haplotypes), each column is one position  
386 whereas in the case of unphased data, each two column corresponds to a single  
387 position with alleles from two chromosomes.

388

### 389 **GAN Model:**

390 We used python-3.6, Keras 2.2.4 deep learning library with TensorFlow backend  
391 (Chollet 2015), pandas 0.23.4 (McKinney 2010) and numpy 1.16.4 (Oliphant 2007) for  
392 the GAN code. Generator of the GAN model we present consists of an input layer with  
393 the size of the latent vector size 600, one hidden layer with size proportional to the  
394 number of SNPs as  $\text{SNP\_number}/1.2$  rounded, another hidden layer with size  
395 proportional to the number of SNPs as  $\text{SNP\_number}/1.1$  rounded and an output layer  
396 with the size of the number of SNPs. The latent vector was set with  
397 `numpy.random.normal` function setting the mean of the distribution as 0 and the  
398 standard deviation as 1. The discriminator consists of an input layer with the size of  
399 the number of SNPs, one hidden layer with size proportional to the number of SNPs  
400 as  $\text{SNP\_number}/2$  rounded, another hidden layer with size proportional to the number  
401 of SNPs as  $\text{SNP\_number}/3$  rounded and an output layer of size 1. All layer outputs  
402 except for output layers have LeakyReLU activation functions with `leaky_alpha`

403 parameter 0.01 and L2 regularization parameter 0.0001. The generator output layer  
404 activation function is tanh and discriminator output layer activation function is sigmoid.  
405 Both discriminator and combined GAN were compiled with Adam optimization  
406 algorithm with binary cross entropy loss function. We set the discriminator learning rate  
407 as 0.0008 and combined GAN learning rate as 0.0001. For 5000 SNP data, the  
408 discriminator learning rate was 0.00008 and combined GAN learning rate was 0.00001.  
409 Training to test dataset ratio was 3:1. We used batch size of 32 and trained all datasets  
410 up to 20000 epochs. We tried stopping the training based on  $AA_{TS}$  scores. The score  
411 was calculated at 200 epoch intervals. For 805 SNP data,  $AA_{TS}$  converged very quickly  
412 close to optimum 0.5 score. However, the difference between  $AA_{truth}$  and  $AA_{syn}$  scores  
413 indicates possible overfitting to multiple data points so it was difficult to define a  
414 stopping point. For 10K SNP data, convergence was observed after ~30K epochs (to  
415 around 0.75) and reduced the number of fixed alleles in AGs but the gain was very  
416 minimal (Supplementary Figure 16). Additionally, GAN was prone to mode collapse  
417 especially after 20K epochs which resulted in multiple failed training attempts.  
418 Therefore, we stopped training based on coherent PCA results of AGs with real  
419 genomes. During each batch in the training, when only the discriminator is trained, we  
420 applied smoothing to the real labels (1) by vectoral addition of random uniform  
421 distribution via `numpy.random.uniform` with lower bound 0 and upper bound 0.1.  
422 Elements of the generated outputs were rounded to 0 or 1 with `numpy rint` function.

423

#### 424 **RBM Model:**

425 The RBM was coded in Julia (Bezanson et al. 2017), and all the algorithm for the  
426 training has been done by the authors. The part of the algorithm involving linear algebra  
427 used the standard package provided by Julia. Two versions of the RBM were  
428 considered. In both versions, the visible nodes were encoded using Bernoulli random  
429 variables  $\{0,1\}$ , and the size of the visible layer was the same size as the considered  
430 input. Two different types of hidden layers were considered. First with a sigmoid  
431 activation function (hence having discrete  $\{0,1\}$  hidden variables), second with ReLU  
432 (Rectified Linear unit) activations in which case the hidden variables were positive and  
433 continuous (there are distributed according to a truncated gaussian distribution when  
434 conditioning on the values of the visible variables). Results with sigmoid activation  
435 function were worse compared to ReLU so we used ReLU for all the analyses  
436 (Supplementary Figure 17MY). The number of hidden nodes considered for the

437 experiment was  $N_h=100$  for the 805 SNP dataset and  $N_h=500$  for the 10k one. There  
438 is no canonical way of fixing the number of hidden nodes, in practice we checked that  
439 the number of eigenvalues learnt by the model was smaller than the number of hidden  
440 nodes, and that by adding more hidden nodes no improvement were observed during  
441 the learning. The learning in general is quite stable, in order to have a smooth learning  
442 curve, the learning rate was set between 0.001 and 0.0001 and we used batch size of  
443 32. The negative term of the gradient of the likelihood function was approximated using  
444 the PCDk method (Brügge et al. 2013), with  $k=10$  and 100 of persistent chains. As a  
445 stopping criterion, we looked at when the  $AA_{TS}$  score converges to the ideal value of  
446 0.5 when sampling the learned distribution. When dealing with large and sparse  
447 datasets for selection tests, RBM model did not manage to provide reasonable  $AA_{TS}$   
448 scores because the sampling is intrinsically difficult for large systems with strong  
449 correlation. In that case, we used coherent PCA results as a stopping criterion.

450

#### 451 **Bernoulli Distribution Model:**

452 We used python-3.6, pandas 0.23.4 and numpy 1.16.4 for the Bernoulli distribution  
453 model code. Each allele at a given position was randomly drawn given the derived  
454 allele frequency in the real population.

455

#### 456 **Markov Chain Model:**

457 We used python-3.6, pandas 0.23.4 and numpy 1.16.4 for the Markov chain model  
458 code. Allele at the initial position was set by drawing from a Bernoulli distribution  
459 parameterized with the real frequency. Each successive allele was then drawn  
460 randomly according to its probability given the previous sequence window. After the  
461 initial position, the sequence window size increased incrementally up to a predefined  
462 window size (5 or 10 SNPs).

463

#### 464 **Chromosome Painting:**

465 We compared the haplotype sharing distribution between real and artificial  
466 chromosomes through ChromoPainter (Lawson et al. 2012). In detail, we have painted  
467 100 randomly selected “real” and “artificial” Estonians (recipients) against all the 1000  
468 Genome Project phased data (donors). The nuisance parameters  $-n$  (348.57) and  $-M$   
469 (0.00027), were estimated running 10 iterations of the expectation-maximization  
470 algorithm on a subset of 3,800 donor haplotypes.

471

## 472 **Haplostrips:**

473 We used Haplostrips (Marnetto and Huerta-Sánchez 2017) to visualize the haplotype  
474 structure of real and artificial genomes. We extracted 500 individuals from each sample  
475 set (Real, GAN AGs, RBM AGs) and considered them as different populations. Black  
476 dots represent derived alleles, white dots represent ancestral alleles. The plotted SNPs  
477 were filtered for a population specific minor allele frequency >5%; haplotypes were  
478 clustered and sorted for distance against the consensus haplotype from the real set.  
479 See the application article for further details about the method.

480

## 481 **Nearest Neighbour Adversarial Accuracy (AA<sub>TS</sub>) and Privacy Loss**

482 We used the following equations for calculating AA<sub>TS</sub> and privacy loss scores (Yale et  
483 al. 2019):

$$484 \quad AA_{truth} = \frac{1}{n} \sum_{i=1}^n \mathbf{1}(d_{TS}(i) > d_{TT}(i))$$

$$485 \quad AA_{syn} = \frac{1}{n} \sum_{i=1}^n \mathbf{1}(d_{ST}(i) > d_{SS}(i))$$

$$486 \quad AA_{TS} = \frac{1}{2} (AA_{true} + AA_{syn})$$

$$487 \quad \textit{Privacy Loss} = \textit{Test } AA_{TS} - \textit{Train } AA_{TS}$$

488

489 where  $n$  is the number of real samples as well as of artificial samples;  $\mathbf{1}$  is a function  
490 which takes the value 1 if the argument is true and 0 if the argument is false;  $d_{TS}(i)$  is  
491 the distance between the real genome indexed by  $i$  and its nearest neighbour in the  
492 artificial genome dataset;  $d_{ST}(i)$  is the distance between the artificial genome indexed  
493 by  $i$  and its nearest neighbour in the real genome dataset;  $d_{TT}(i)$  is the distance of the  
494 real genome indexed by  $i$  to its nearest neighbour in the real genome dataset;  $d_{SS}(i)$   
495 is the distance of the artificial genome indexed by  $i$  to its nearest neighbour in the  
496 artificial genome dataset. An AA<sub>TS</sub> score of 0.5 is optimal whereas lower values  
497 indicate overfitting and higher values indicate underfitting. For a better resolution for  
498 the detection of overfitting, we also provided AA<sub>truth</sub> and AA<sub>syn</sub> metrics identified in the  
499 general equation of AA<sub>TS</sub>. If AA<sub>TS</sub>  $\approx$  0.5 but AA<sub>truth</sub>  $\approx$  0 and AA<sub>syn</sub>  $\approx$  1, this means that  
500 the model is not overfitting in terms of a single data point but multiple ones. In other

501 words, the model might be focusing on small batches of similar real genomes to create  
502 artificial genomes clustered at the center of each batch.

503

504 **Selection Tests:**

505 We used scikit-allel package for XP-EHH (Sabeti et al. 2007) and PBS (Yi et al. 2010)  
506 tests. We used 1000 Estonian individuals (2000 haplotypes) with 3348 SNPs which  
507 were homogenously dispersed over chromosome 15 for the training of GAN and RBM  
508 models. For XP-EHH, Yoruban (YRI, 216 haplotypes) population from 1000 Genomes  
509 data was used as the complementary population. For PBS, Yoruban (YRI, 216  
510 haplotypes) and Japanese (JPT, 208 haplotypes) populations from 1000 Genomes  
511 data were used as complementary populations. PBS window size was 10 and step  
512 size was 5, resulting in 668 windows. 216 real and 216 AG haplotypes were compared  
513 for the analyses.

514 **Acknowledgements**

515 This work was supported by the European Union through the European Regional  
516 Development Fund (Project No. 2014-2020.4.01.16-0024, MOBTT53: LP, DM, BY;  
517 Project No. 2014-2020.4.01.16-0030: LO, FM); the Estonian Research Council grant  
518 PUT (PRG243): LP; Laboratoire de Recherche en Informatique: FJ. Thanks to Inria  
519 TAU team for providing computational resources. Thanks to Adrien Pavao for his  
520 valuable insight into AA<sub>TS</sub> score.



## 521 **References**

522

523 1000 Genomes Project Consortium, Auton A, Brooks LD, Durbin RM, Garrison EP,  
524 Kang HM, Korbel JO, Marchini JL, McCarthy S, McVean GA, et al. 2015. A global  
525 reference for human genetic variation. *Nature*. 526(7571):68–74.  
526 doi:10.1038/nature15393.

527 Adrion JR, Galloway JG, Kern AD. 2019. Inferring the landscape of recombination  
528 using recurrent neural networks. *bioRxiv*. doi:10.1101/662247.

529 Arjovsky M, Chintala S, Bottou L. 2017. Wasserstein generative adversarial  
530 networks. In: 34th International Conference on Machine Learning, ICML 2017.

531 Basu Mallick C, Iliescu FM, Möls M, Hill S, Tamang R, Chaubey G, Goto R, Ho SYW,  
532 Gallego Romero I, Crivellaro F, et al. 2013. The Light Skin Allele of SLC24A5 in  
533 South Asians and Europeans Shares Identity by Descent. *PLoS Genet*. 9(11).  
534 doi:10.1371/journal.pgen.1003912.

535 Bezanson J, Edelman A, Karpinski S, Shah VB. 2017. Julia: A fresh approach to  
536 numerical computing. *SIAM Rev*. doi:10.1137/141000671.

537 Brock A, Donahue J, Simonyan K. 2018 Sep 28. Large Scale GAN Training for High  
538 Fidelity Natural Image Synthesis. [accessed 2019 Aug 26].  
539 <http://arxiv.org/abs/1809.11096>.

540 Cann HM. 2002. A Human Genome Diversity Cell Line Panel. *Science* (80- ).  
541 doi:10.1126/science.296.5566.261b.

542 Chen X, Duan Y, Houthoof R, Schulman J, Sutskever I, Abbeel P. 2016. InfoGAN:  
543 Interpretable representation learning by information maximizing generative  
544 adversarial nets. In: *Advances in Neural Information Processing Systems*.

545 Chollet F. 2015. Keras: Deep Learning library for Theano and TensorFlow. GitHub  
546 Repos.

547 Colonna V, Ayub Q, Chen Y, Pagani L, Luisi P, Pybus M, Garrison E, Xue Y, Tyler-  
548 Smith C, Abecasis GR, et al. 2014. Human genomic regions with exceptionally high  
549 levels of population differentiation identified from 911 whole-genome sequences.  
550 *Genome Biol*. doi:10.1186/gb-2014-15-6-r88.

551 Davidsen K, Olson BJ, DeWitt WS, Feng J, Harkins E, Bradley P, Matsen FA. 2019.  
552 Deep generative models for T cell receptor protein sequences. *Elife*. 8.  
553 doi:10.7554/eLife.46935. [accessed 2019 Sep 12].  
554 <https://elifesciences.org/articles/46935>.

555 Diaz-Papkovich A, Anderson-Trocme L, Gravel S. 2019. Revealing multi-scale  
556 population structure in large cohorts. *bioRxiv*. doi:10.1101/423632.

557 Donahue J, Krähenbühl P, Darrell T. 2016 May 31. Adversarial Feature Learning.  
558 [accessed 2019 Aug 28]. <http://arxiv.org/abs/1605.09782>.

559 Dumoulin V, Belghazi I, Poole B, Mastropietro O, Lamb A, Arjovsky M, Courville A.  
560 2016 Jun 2. Adversarially Learned Inference. [accessed 2019 Aug 28].  
561 <http://arxiv.org/abs/1606.00704>.

562 Dwork C, McSherry F, Nissim K, Smith A. 2006. Calibrating noise to sensitivity in  
563 private data analysis. In: *Lecture Notes in Computer Science (including subseries*  
564 *Lecture Notes in Artificial Intelligence and Lecture Notes in Bioinformatics)*.

565 Eriksson N, Macpherson JM, Tung JY, Hon LS, Naughton B, Saxonov S, Avey L,

- 566 Wojcicki A, Pe'er I, Mountain J. 2010. Web-based, participant-driven studies yield  
567 novel genetic associations for common traits. *PLoS Genet*.  
568 doi:10.1371/journal.pgen.1000993.
- 569 Fedus W, Goodfellow I, Dai AM. 2018 Jan 23. MaskGAN: Better Text Generation via  
570 Filling in the \_\_\_\_\_. [accessed 2019 Aug 26]. <http://arxiv.org/abs/1801.07736>.
- 571 Flagel L, Brandvain Y, Schrider DR. 2019. The unreasonable effectiveness of  
572 convolutional neural networks in population genetic inference. *Mol Biol Evol*.  
573 doi:10.1093/molbev/msy224.
- 574 Goodfellow I, Pouget-Abadie J, Mirza M. 2014. Generative Adversarial Networks  
575 (GANs) - Tutorial. *Neural Inf Process Syst*.
- 576 Gurdasani D, Carstensen T, Tekola-Ayele F, Pagani L, Tachmazidou I, Hatzikotoulas  
577 K, Karthikeyan S, Iles L, Pollard MO, Choudhury A, et al. 2015. The African Genome  
578 Variation Project shapes medical genetics in Africa. *Nature*.  
579 doi:10.1038/nature13997.
- 580 Han J, Kraft P, Nan H, Guo Q, Chen C, Qureshi A, Hankinson SE, Hu FB, Duffy DL,  
581 Zhen ZZ, et al. 2008. A genome-wide association study identifies novel alleles  
582 associated with hair color and skin pigmentation. *PLoS Genet*.  
583 doi:10.1371/journal.pgen.1000074.
- 584 Hinton GE. 2007. Learning multiple layers of representation. *Trends Cogn Sci*.  
585 doi:10.1016/j.tics.2007.09.004.
- 586 Hinton GE, Salakhutdinov RR. 2006. Reducing the dimensionality of data with neural  
587 networks. *Science (80- )*. doi:10.1126/science.1127647.
- 588 Howie B, Marchini J, Stephens M. 2011. Genotype imputation with thousands of  
589 genomes. *G3 Genes, Genomes, Genet*. doi:10.1534/g3.111.001198.
- 590 Killoran N, Lee LJ, DeLong A, Duvenaud D, Frey BJ. 2017 Dec 17. Generating and  
591 designing DNA with deep generative models. [accessed 2019 Sep 15].  
592 <http://arxiv.org/abs/1712.06148>.
- 593 Kingma DP, Welling M. 2013 Dec 20. Auto-Encoding Variational Bayes. [accessed  
594 2019 Aug 26]. <http://arxiv.org/abs/1312.6114>.
- 595 Larochelle H, Bengio Y. 2008. Classification using discriminative restricted boltzmann  
596 machines. In: *Proceedings of the 25th International Conference on Machine*  
597 *Learning*.
- 598 Lawson DJ, Hellenthal G, Myers S, Falush D. 2012. Inference of population structure  
599 using dense haplotype data. *PLoS Genet*. 8(1):11–17.  
600 doi:10.1371/journal.pgen.1002453.
- 601 Ledig C, Theis L, Huzár F, Caballero J, Cunningham A, Acosta A, Aitken A, Tejani  
602 A, Totz J, Wang Z, et al. 2017. Photo-realistic single image super-resolution using a  
603 generative adversarial network. In: *Proceedings - 30th IEEE Conference on*  
604 *Computer Vision and Pattern Recognition, CVPR 2017*.
- 605 Leitsalu L, Haller T, Esko T, Tammesoo ML, Alavere H, Snieder H, Perola M, Ng PC,  
606 Mägi R, Milani L, et al. 2015. Cohort profile: Estonian biobank of the Estonian  
607 genome center, university of Tartu. *Int J Epidemiol*. doi:10.1093/ije/dyt268.
- 608 Libbrecht MW, Noble WS. 2015. Machine learning applications in genetics and  
609 genomics. *Nat Rev Genet*. doi:10.1038/nrg3920.

- 610 Liu Q, Lv H, Jiang R. 2019. HicGAN infers super resolution Hi-C data with generative  
611 adversarial networks. In: *Bioinformatics*. Vol. 35. Oxford University Press. p. i99–  
612 i107.
- 613 Lucas T, Tallec C, Verbeek J, Ollivier Y. 2018. Mixed batches and symmetric  
614 discriminators for GAN training. In: *35th International Conference on Machine  
615 Learning, ICML 2018*.
- 616 Mallick S, Li H, Lipson M, Mathieson I, Gymrek M, Racimo F, Zhao M, Chennagiri N,  
617 Nordenfelt S, Tandon A, et al. 2016. The Simons Genome Diversity Project: 300  
618 genomes from 142 diverse populations. *Nature*. doi:10.1038/nature18964.
- 619 Mardis ER. 2017. DNA sequencing technologies: 2006-2016. *Nat Protoc*.  
620 doi:10.1038/nprot.2016.182.
- 621 Marnetto D, Huerta-Sánchez E. 2017. Haplostrips: revealing population structure  
622 through haplotype visualization. *Methods Ecol Evol*. 8(10):1389–1392.  
623 doi:10.1111/2041-210X.12747.
- 624 McKinney W. 2010. Data Structures for Statistical Computing in Python. In:  
625 *Proceedings of the 9th Python in Science Conference*.
- 626 Mitt M, Kals M, Pärn K, Gabriel SB, Lander ES, Palotie A, Ripatti S, Morris AP,  
627 Metspalu A, Esko T, et al. 2017. Improved imputation accuracy of rare and low-  
628 frequency variants using population-specific high-coverage WGS-based imputation  
629 reference panel. *Eur J Hum Genet*. doi:10.1038/ejhg.2017.51.
- 630 Oliphant TE. 2007. SciPy: Open source scientific tools for Python. *Comput Sci Eng*.
- 631 Popejoy AB, Fullerton SM. 2016. Genomics is failing on diversity. *Nature*.  
632 doi:10.1038/538161a.
- 633 Radford A, Metz L, Chintala S. 2016. Unsupervised Representation learning with  
634 Deep Convolutional GANs. *Int Conf Learn Represent*. doi:10.1051/0004-  
635 6361/201527329.
- 636 Rolnick D, Dyer EL. 2019. Generative models and abstractions for large-scale  
637 neuroanatomy datasets. *Curr Opin Neurobiol*. doi:10.1016/j.conb.2019.02.005.
- 638 Sabeti PC, Varilly P, Fry B, Lohmueller J, Hostetter E, Cotsapas C, Xie X, Byrne EH,  
639 McCarroll SA, Gaudet R, et al. 2007. Genome-wide detection and characterization of  
640 positive selection in human populations. *Nature*. doi:10.1038/nature06250.
- 641 Salimans T, Goodfellow I, Zaremba W, Cheung V, Radford A, Chen X. 2016.  
642 Improved techniques for training GANs. In: *Advances in Neural Information  
643 Processing Systems*.
- 644 Sheehan S, Song YS. 2016. Deep Learning for Population Genetic Inference. *PLoS  
645 Comput Biol*. 12(3):1–28. doi:10.1371/journal.pcbi.1004845.
- 646 Shimagaki K, Weigt M. 2019 Sep 5. Selection of sequence motifs and generative  
647 Hopfield-Potts models for protein families. *bioRxiv*.:652784. doi:10.1101/652784.
- 648 Sirugo G, Williams SM, Tishkoff SA. 2019. The Missing Diversity in Human Genetic  
649 Studies. *Cell*. doi:10.1016/j.cell.2019.02.048.
- 650 Smolensky P. 1986. Information processing in dynamical systems: Foundations of  
651 harmony theory. In: *Parallel Distributed Processing Explorations in the Microstructure  
652 of Cognition*.
- 653 Teh YW, Hinton GE. 2001. Rate-coded restricted boltzmann machines for face

654 recognition. In: Advances in Neural Information Processing Systems.  
655 Torkzadehmahani R, Kairouz P, Ai G, Paten B. 2019. DP-CGAN : Differentially  
656 Private Synthetic Data and Label Generation. Proceedings of the IEEE Conference  
657 on Computer Vision and Pattern Recognition Workshops.  
658 Tubiana J, Cocco S, Monasson R. 2019. Learning protein constitutive motifs from  
659 sequence data. Elife. doi:10.7554/eLife.39397.  
660 Yale A, Dash S, Dutta R, Guyon I, Pavao A, Bennett K. 2019 Apr 24. Privacy  
661 Preserving Synthetic Health Data. [accessed 2019 Aug 27]. [https://hal.inria.fr/hal-](https://hal.inria.fr/hal-02160496/)  
662 [02160496/](https://hal.inria.fr/hal-02160496/).  
663 Yi X, Liang Y, Huerta-Sanchez E, Jin X, Cuo ZXP, Pool JE, Xu N, Jiang H,  
664 Vinckenbosch N, Korneliussen TS, et al. 2010. Sequencing of 50 human exomes  
665 reveals adaptation to high altitude. Science (80- ). doi:10.1126/science.1190371.  
666 Zhang H, Xu T, Li H, Zhang S, Wang X, Huang X, Metaxas D. 2017. StackGAN: Text  
667 to Photo-Realistic Image Synthesis with Stacked Generative Adversarial Networks.  
668 In: Proceedings of the IEEE International Conference on Computer Vision.  
669 Zhang M, Song F, Liang L, Nan H, Zhang J, Liu H, Wang LE, Wei Q, Lee JE, Amos  
670 CI, et al. 2013. Genome-wide association studies identify several new loci associated  
671 with pigmentation traits and skin cancer risk in European Americans. Hum Mol  
672 Genet. doi:10.1093/hmg/ddt142.  
673
